# Supplementary material for: Graphitic phosphorus coordinated single Fe atoms for hydrogenative transformations
Source: PubMed Central journal article supplement (PMC7426939; doi:10.1038/s41467-020-17903-0), 2020-08-13
Supplement: 41467_2020_17903_MOESM1_ESM.pdf [file 41467_2020_17903_MOESM1_ESM.pdf]

## Supplementary Information

### Graphitic phosphorus coordinated single Fe atoms for hydrogenative transformations

Long et al

## Supplementary Figures

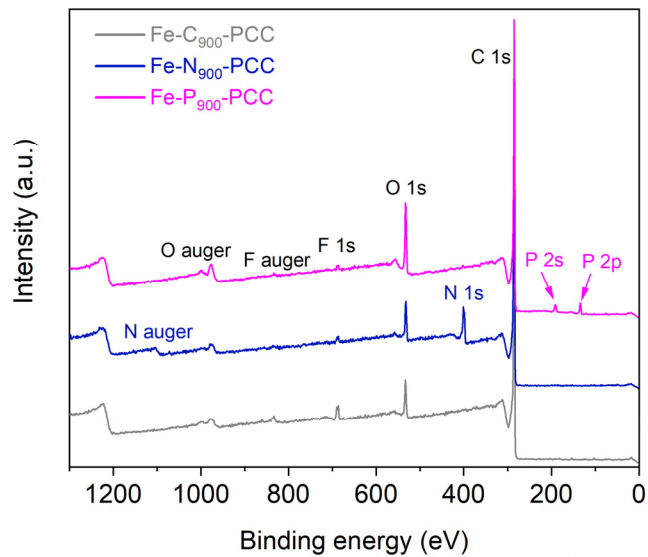

**Supplementary Figure 1.** XPS survey spectra of the Fe-C<sub>900</sub>-PCC, Fe-N<sub>900</sub>-PCC and Fe-P<sub>900</sub>-PCC. The main elemental contributions are indicated.

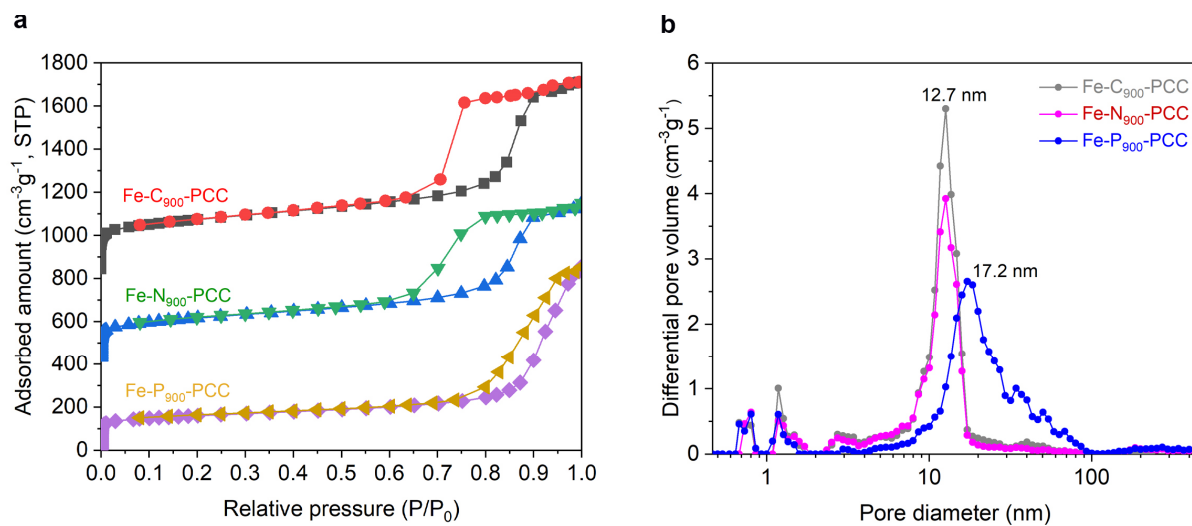

**Supplementary Figure 2. Textural properties.** N<sub>2</sub> adsorption-desorption isotherms (a) and pore size distribution curves (b) for Fe-C<sub>900</sub>-PCC, Fe-N<sub>900</sub>-PCC, and Fe-P<sub>900</sub>-PCC.

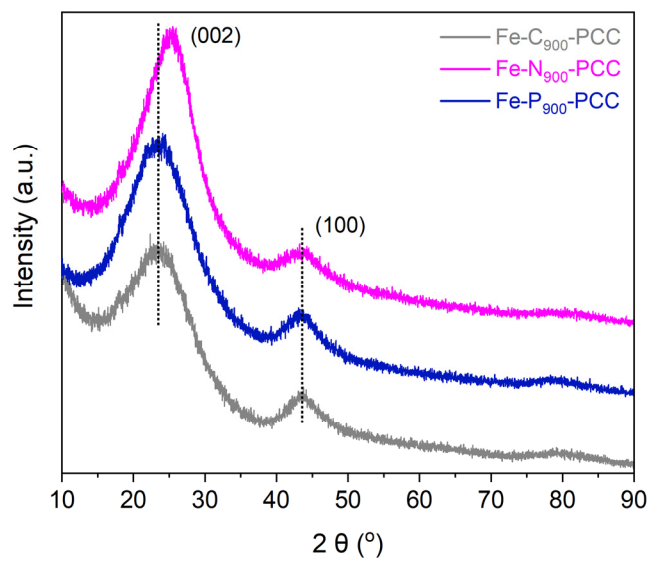

**Supplementary Figure 3. XRD patterns of the Fe-C<sub>900</sub>-PCC, Fe-N<sub>900</sub>-PCC and Fe-P<sub>900</sub>-PCC.**

The diffraction peaks (002, 100) are labelled in the spectra.



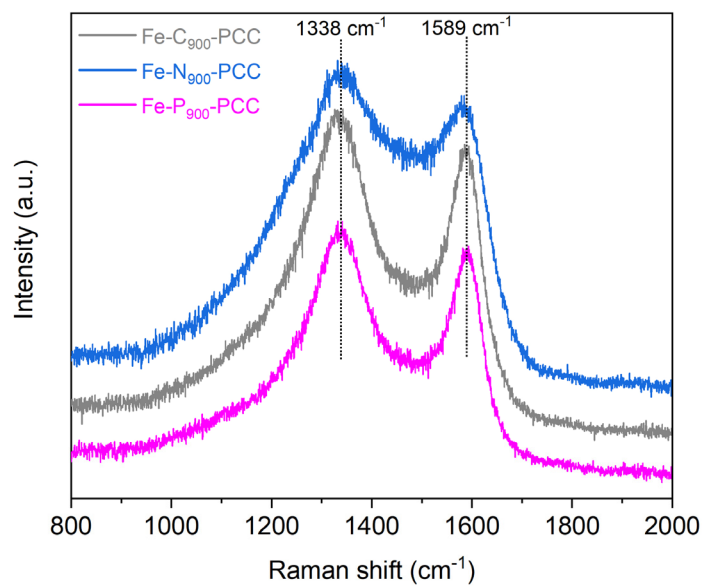

**Supplementary Figure 4. Raman spectra of the Fe-C<sub>900</sub>-PCC, Fe-N<sub>900</sub>-PCC and Fe-P<sub>900</sub>-PCC.** For all of the samples, only D-band (1338 cm<sup>-1</sup>) and G-band (1589 cm<sup>-1</sup>) of carbon have been detected.

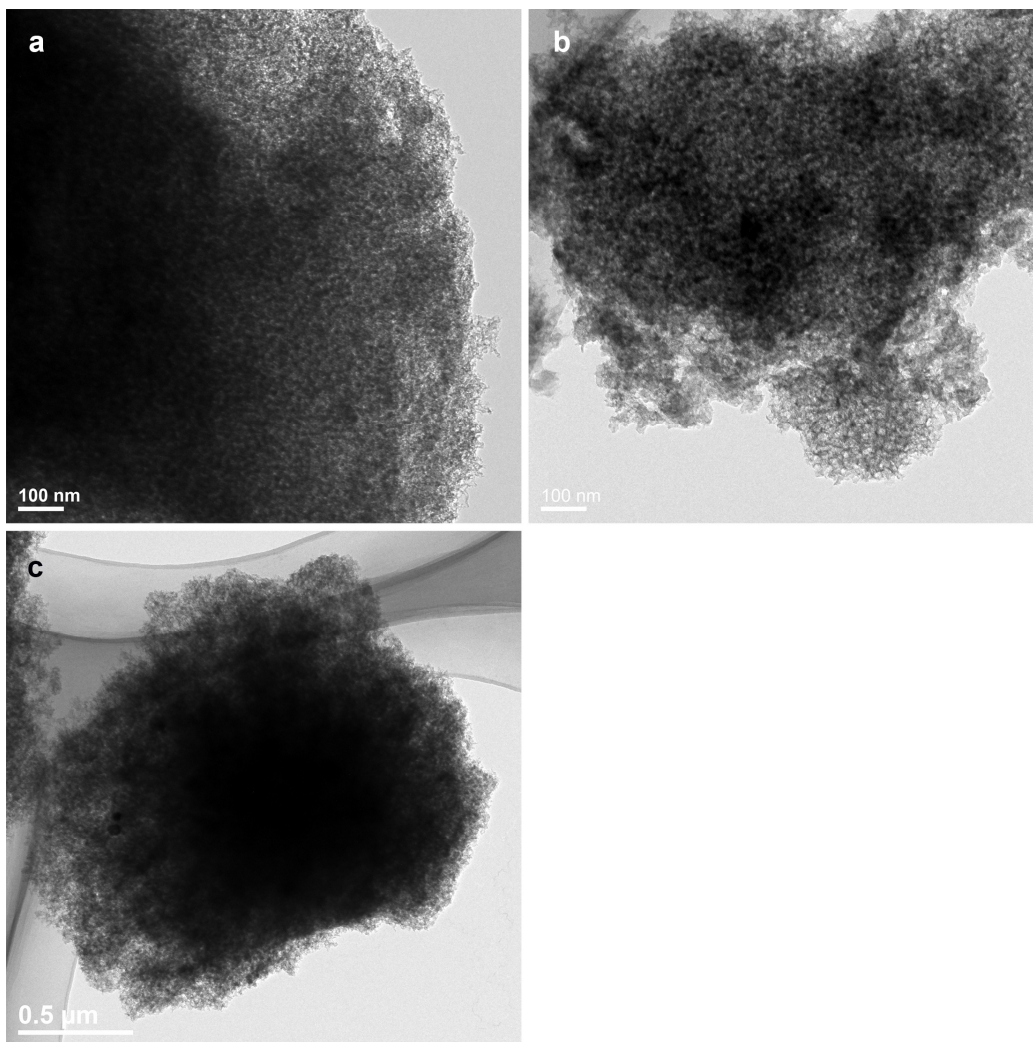

**Supplementary Figure 5. Morphology characterization of the catalysts.** TEM images of (a) Fe-C<sub>900</sub>-PCC, (b) Fe-N<sub>900</sub>-PCC and (c) Fe-P<sub>900</sub>-PCC.

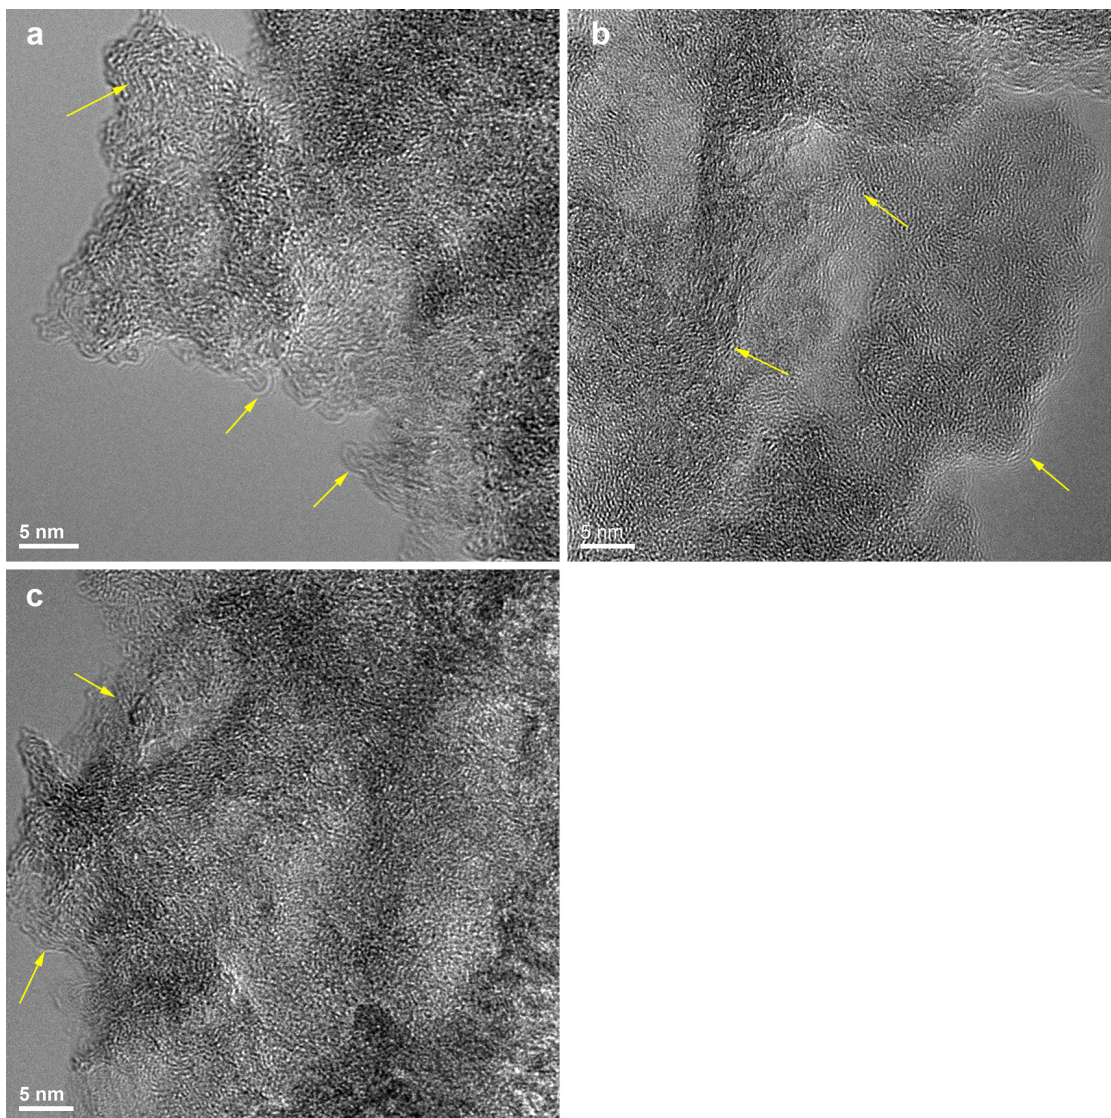

**Supplementary Figure 6. HRTEM images of the catalysts. (a) Fe-C<sub>900</sub>-PCC. (b) Fe-N<sub>900</sub>-PCC. (c) Fe-P<sub>900</sub>-PCC. Graphitic layers are highlighted by yellow arrows.**



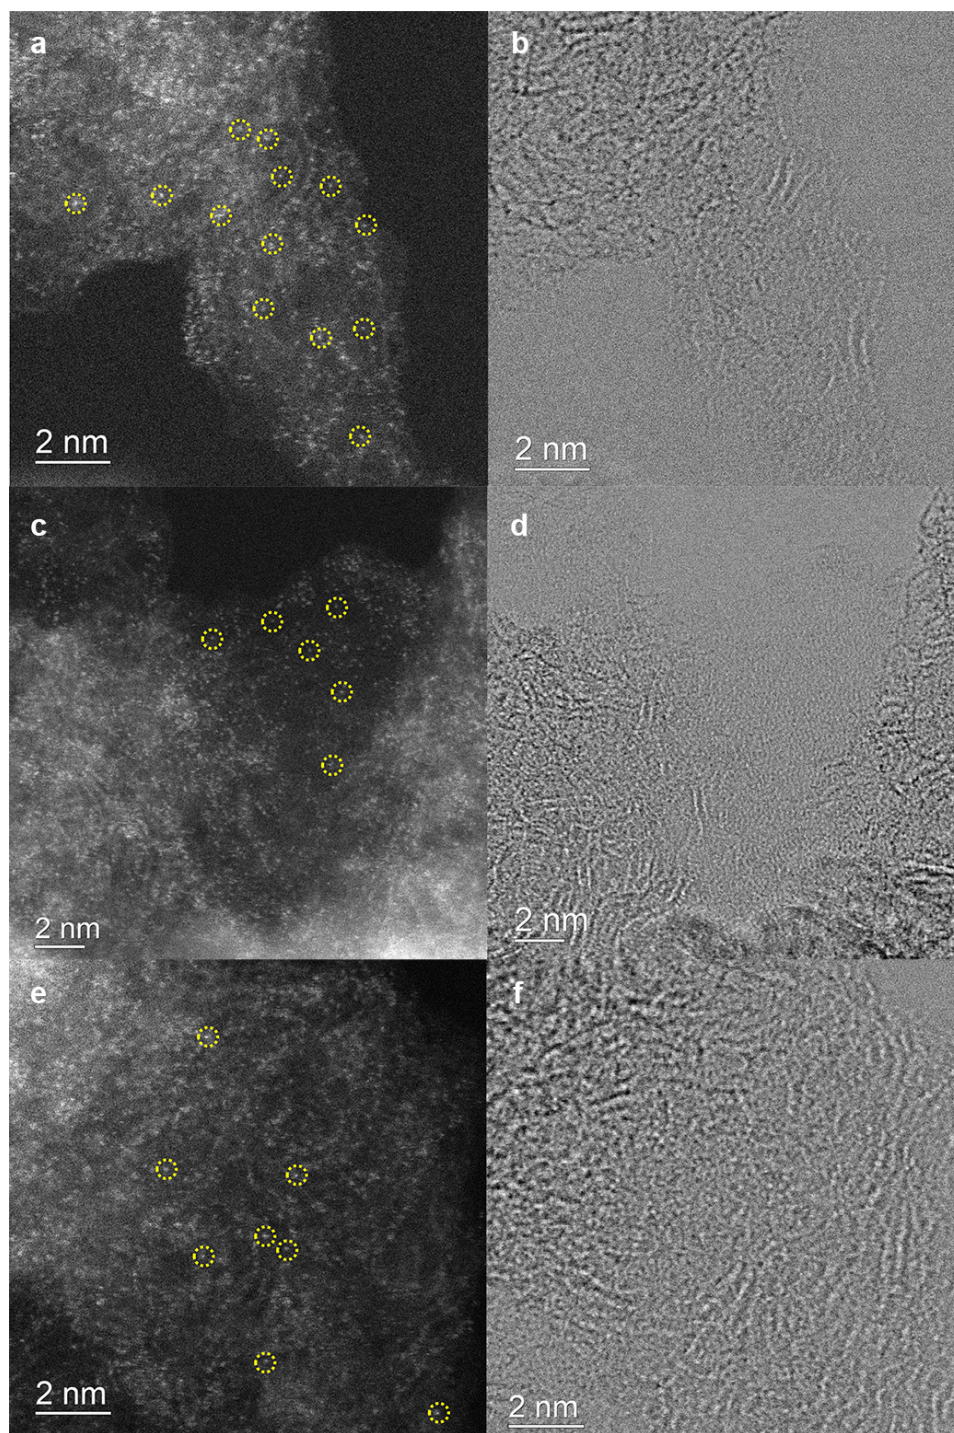

**Supplementary Figure 7. Characterize the Fe single atoms in the Fe-N<sub>900</sub>-PCC. (a, c, e)** Representative AC-STEM images, Fe single atoms are highlighted by yellow circles. **(b, d, f)** Corresponding HRTEM images.



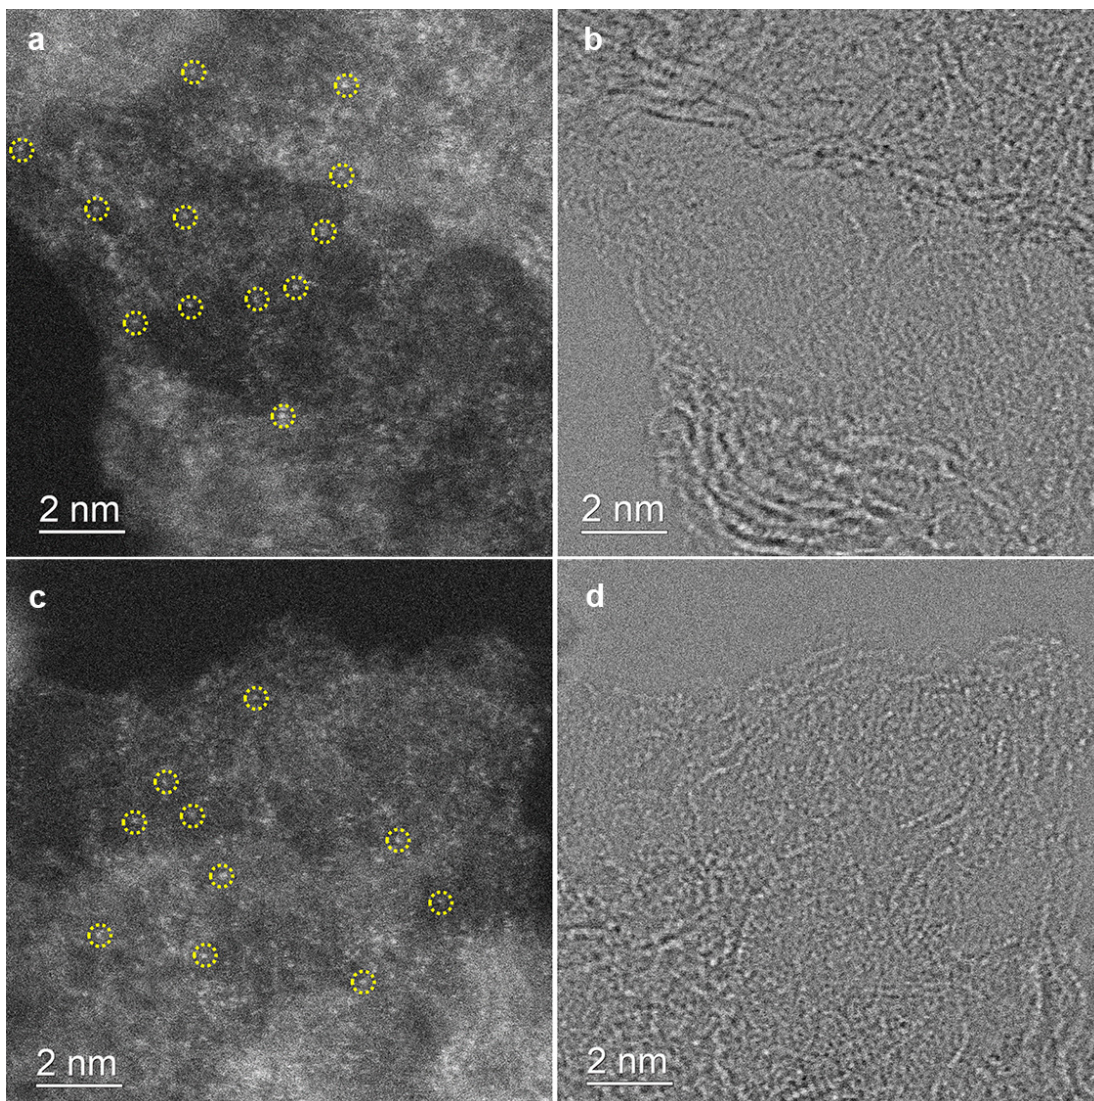

**Supplementary Figure 8. Characterize the Fe single atoms in the Fe-P<sub>900</sub>-PCC. (a, c)** Representative AC-STEM images, Fe single atoms are highlighted by yellow circles. **(b, d)** Corresponding HRTEM images.

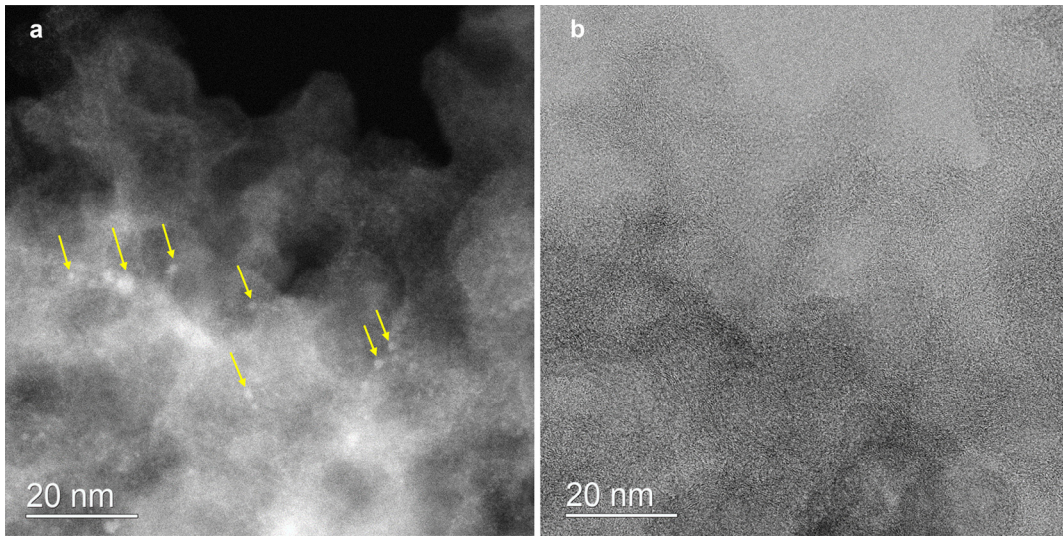

**Supplementary Figure 9. Characterize the Fe nanoparticles in the Fe-N<sub>900</sub>-PCC. (a)** STEM image, Fe nanoparticles are highlighted by yellow arrows. **(b)** Corresponding HRTEM image.



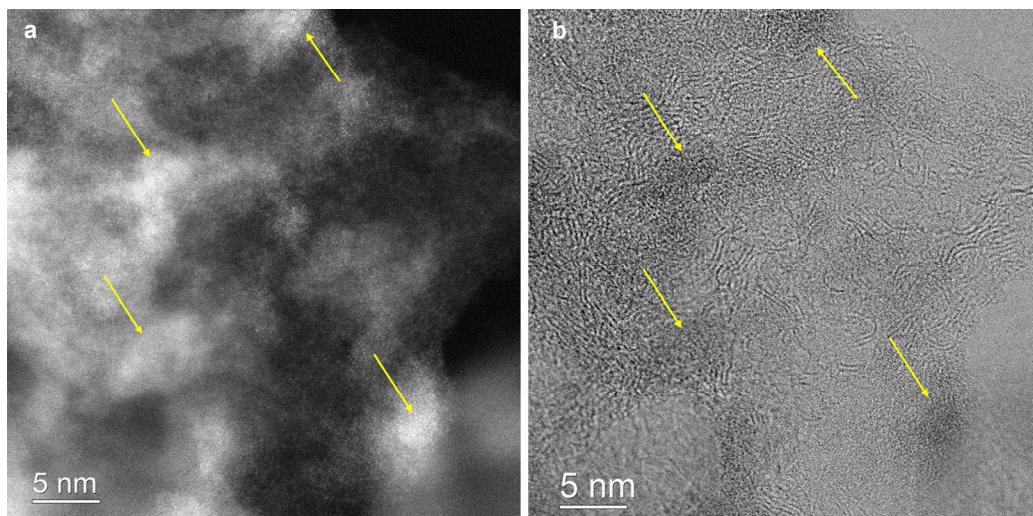

**Supplementary Figure 10. Characterize the Fe nanoparticles in the Fe-P<sub>900</sub>-PCC. (a) STEM image. (b) Corresponding HRTEM image. Fe nanoparticles are highlighted by yellow arrows.**

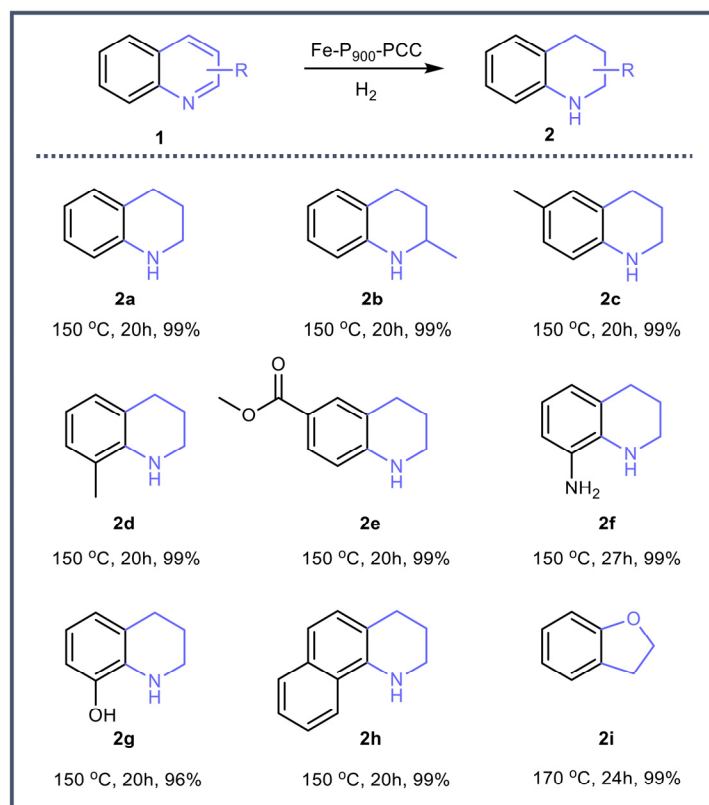

**Supplementary Figure 11. Exploration of substrate scope for the hydrogenation of unsaturated N-heterocycles.** Reaction conditions: 1 mmol substrate, 100 mg Fe-P<sub>900</sub>-PCC, 2 mL solvent (heptane), 4 MPa H<sub>2</sub>. Yields were determined by GC using dodecane as an internal standard.



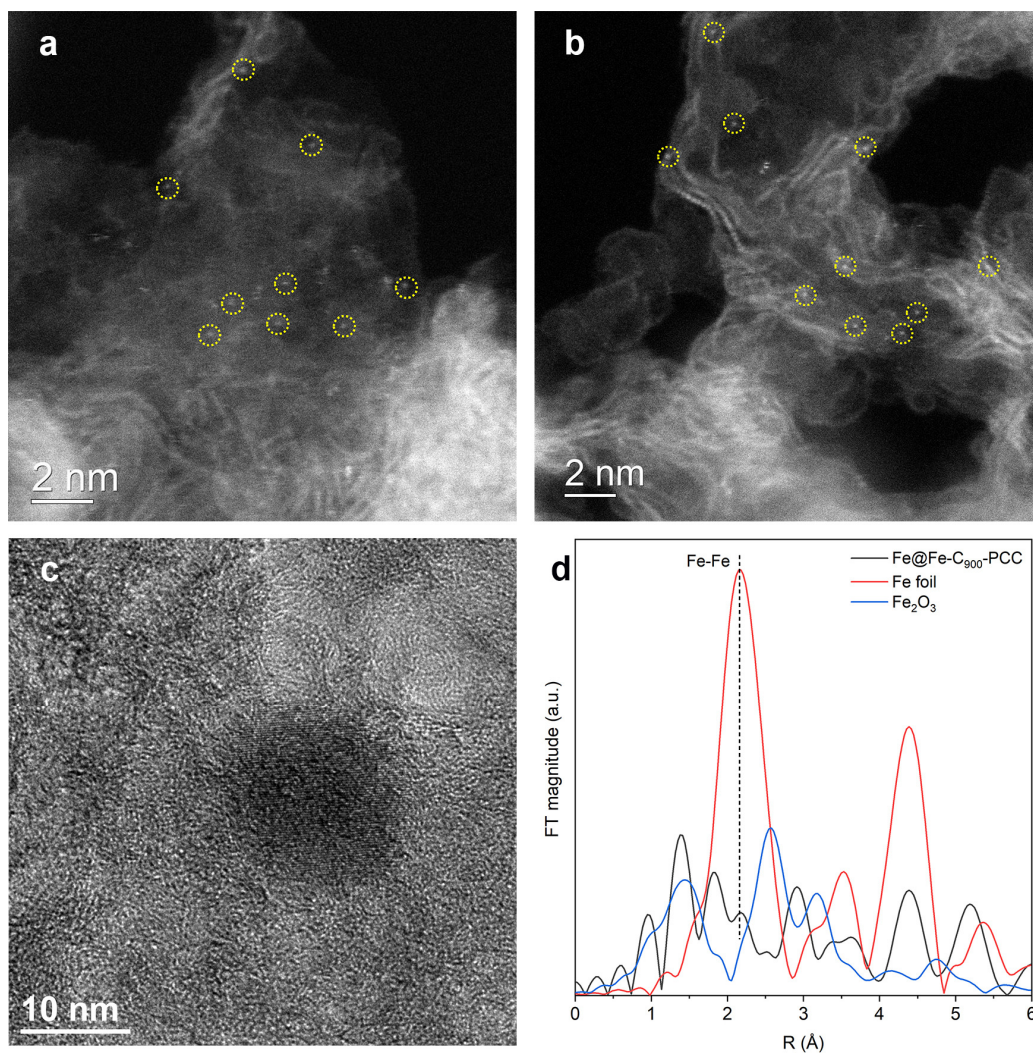

**Supplementary Figure 12. Characterizations of the Fe@Fe-C<sub>900</sub>-PCC.** (a, b) AC-STEM images, Fe single atoms are highlighted by yellow circles. (c) HRTEM image. (d) Fe K-edge EXAFS spectra of Fe@Fe-C<sub>900</sub>-PCC and reference materials (Fe foil and Fe<sub>2</sub>O<sub>3</sub>).

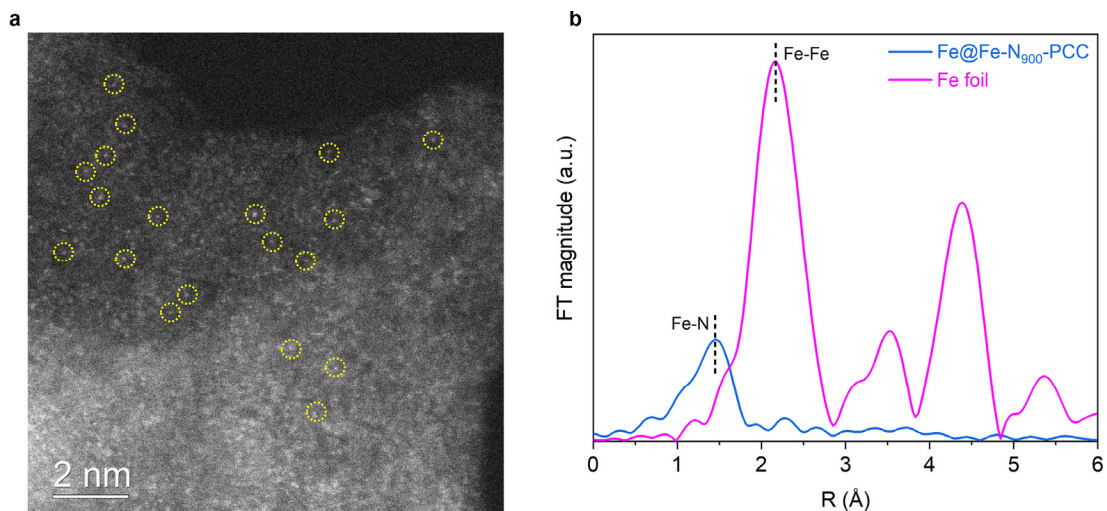

**Supplementary Figure 13. Characterizations of the Fe@Fe-N<sub>900</sub>-PCC.** (a) AC-STEM image, Fe single atoms are highlighted by yellow circles. (b) Fe K-edge EXAFS spectra of Fe@Fe-N<sub>900</sub>-PCC and Fe foil.

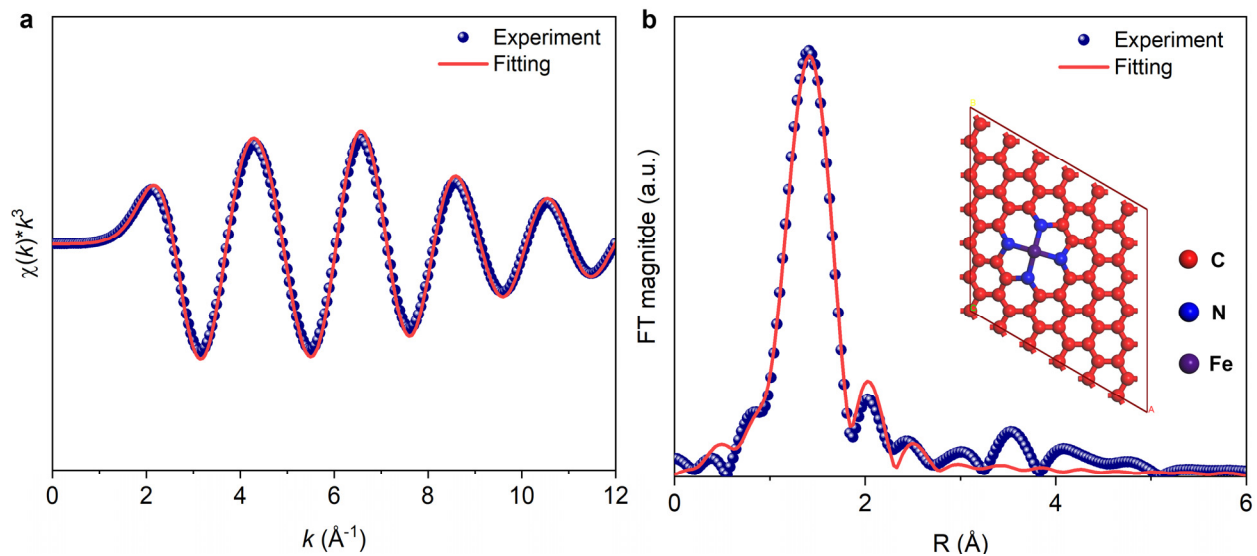

**Supplementary Figure 14. Chemical environment of the Fe@Fe-N<sub>900</sub>-PCC.** Fe K-edge EXAFS analysis of the Fe@Fe-N<sub>900</sub>-PCC at  $k$ -space (a) and  $R$ -space (b), respectively. The inset in (b) demonstrates the schematic model of Fe-N<sub>4</sub>. The best-fit structural parameters are listed in Supplementary Table 6.

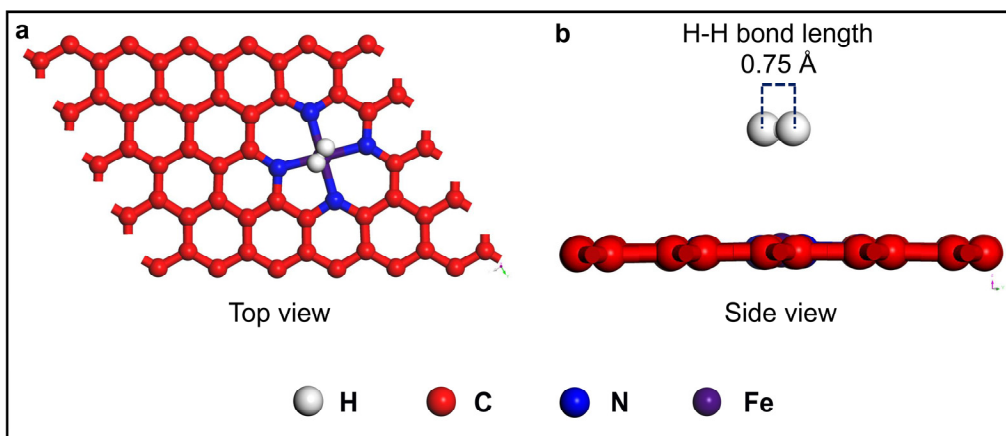

**Supplementary Figure 15. Adsorption configurations of H<sub>2</sub> molecule on Fe-N<sub>4</sub> structure. (a) Top view. (b) Side view.**

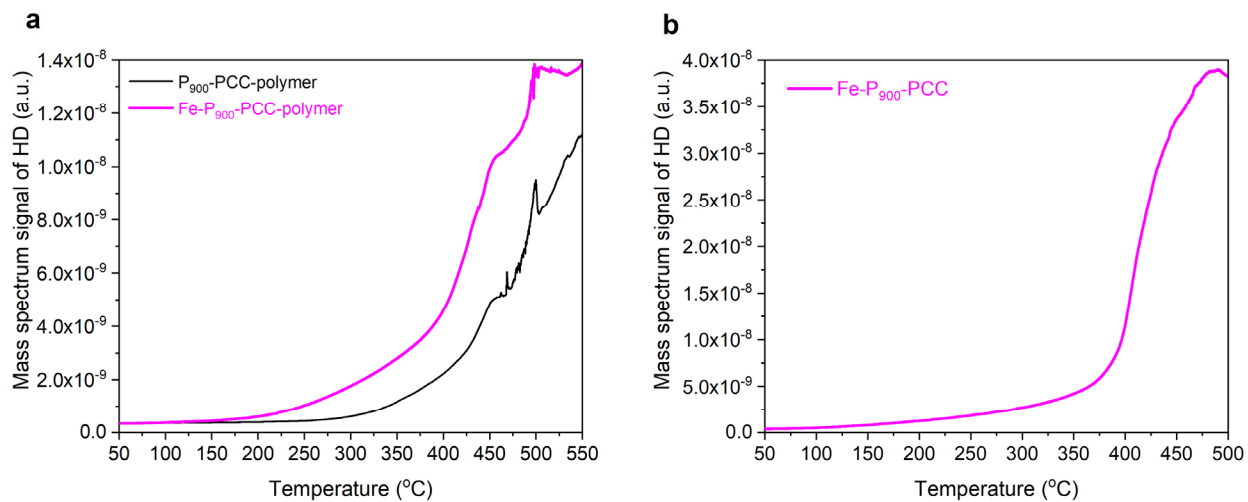

**Supplementary Figure 16. Gas-phase isotopic H<sub>2</sub>-D<sub>2</sub> exchange experiments. (a)** HD profiles of polymer derived catalysts (P<sub>900</sub>-PCC-polymer, Fe-P<sub>900</sub>-PCC-polymer). **(b)** HD profile of Fe-P<sub>900</sub>-PCC.

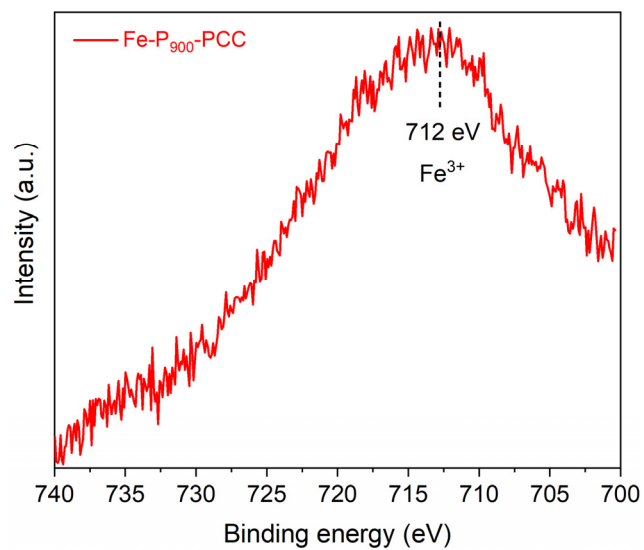

**Supplementary Figure 17. Fe 2p XPS spectrum of the Fe-P<sub>900</sub>-PCC.** The black vertical line indicate the binding energy of Fe 2p<sub>3/2</sub> of Fe<sup>3+</sup>.

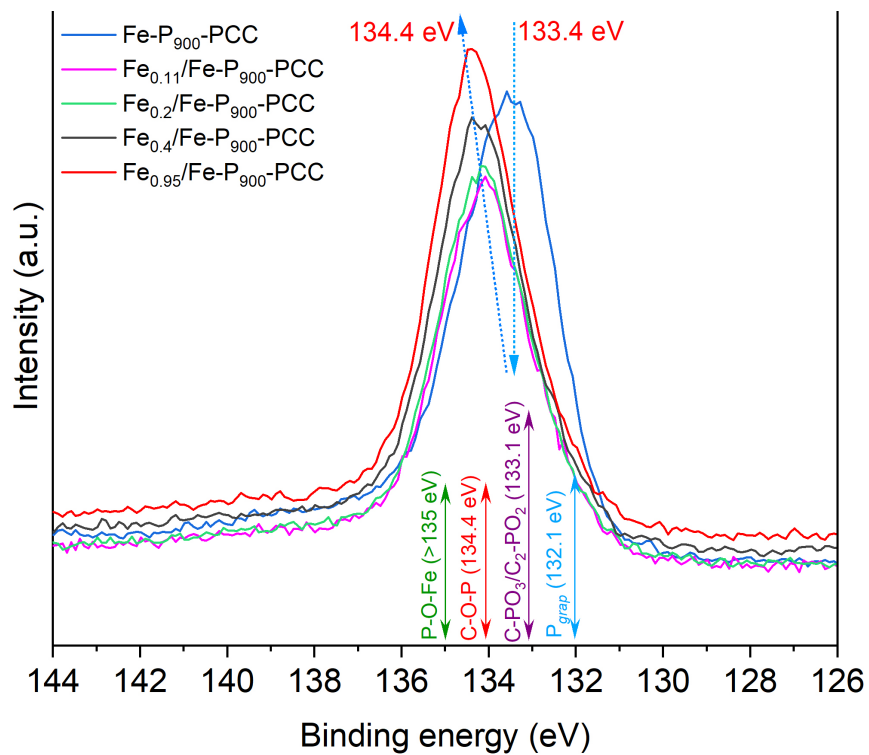

**Supplementary Figure 18. P 2p XPS spectra of Fe-P<sub>900</sub>-PCC and Fe<sub>x</sub>/Fe-P<sub>900</sub>-PCC.** The P 2p XPS spectra of Fe-P<sub>900</sub>-PCC have been changed by post-impregnation Fe species.

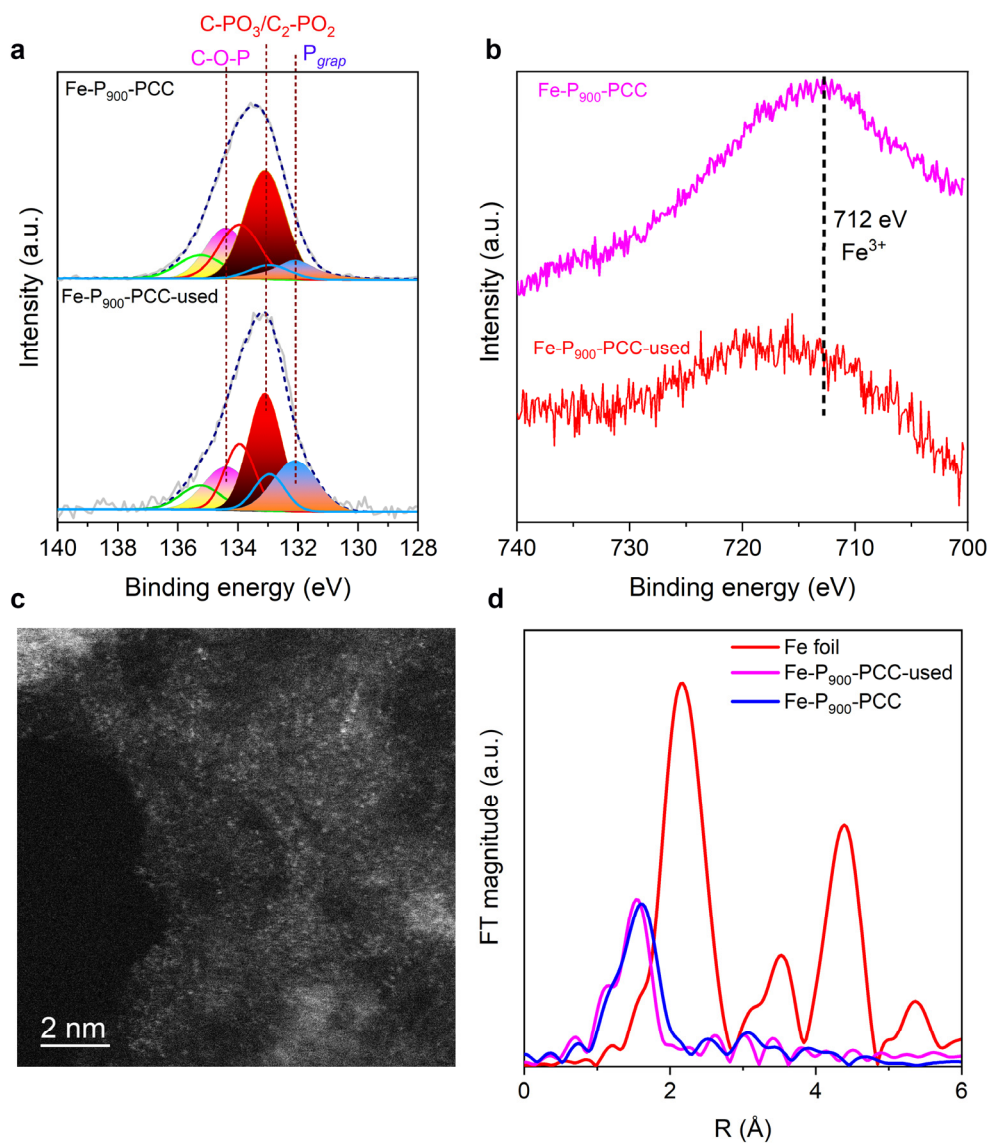

**Supplementary Figure 19. Characterizations of spent Fe-P<sub>900</sub>-PCC.** (a) P 2p XPS spectra, the contents of different P species are listed in Supplementary Table 5. (b) Fe 2p XPS spectra. (c) STEM image of Fe-P<sub>900</sub>-PCC-used. (d) Fe K-edge EXAFS spectra of Fe-P<sub>900</sub>-PCC and Fe-P<sub>900</sub>-PCC-used, as well as the reference sample Fe foil.



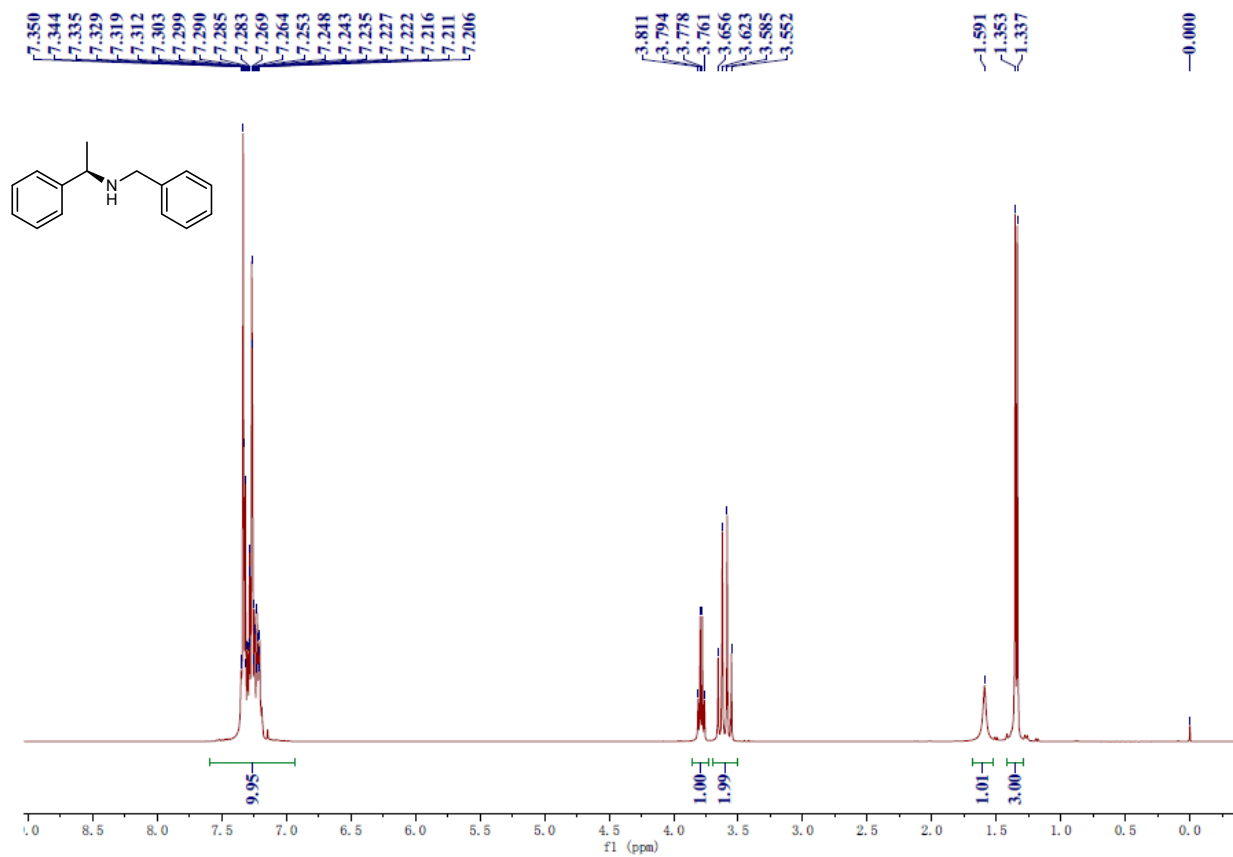

Supplementary Figure 20. <sup>1</sup>H NMR spectrum of compound 5n.

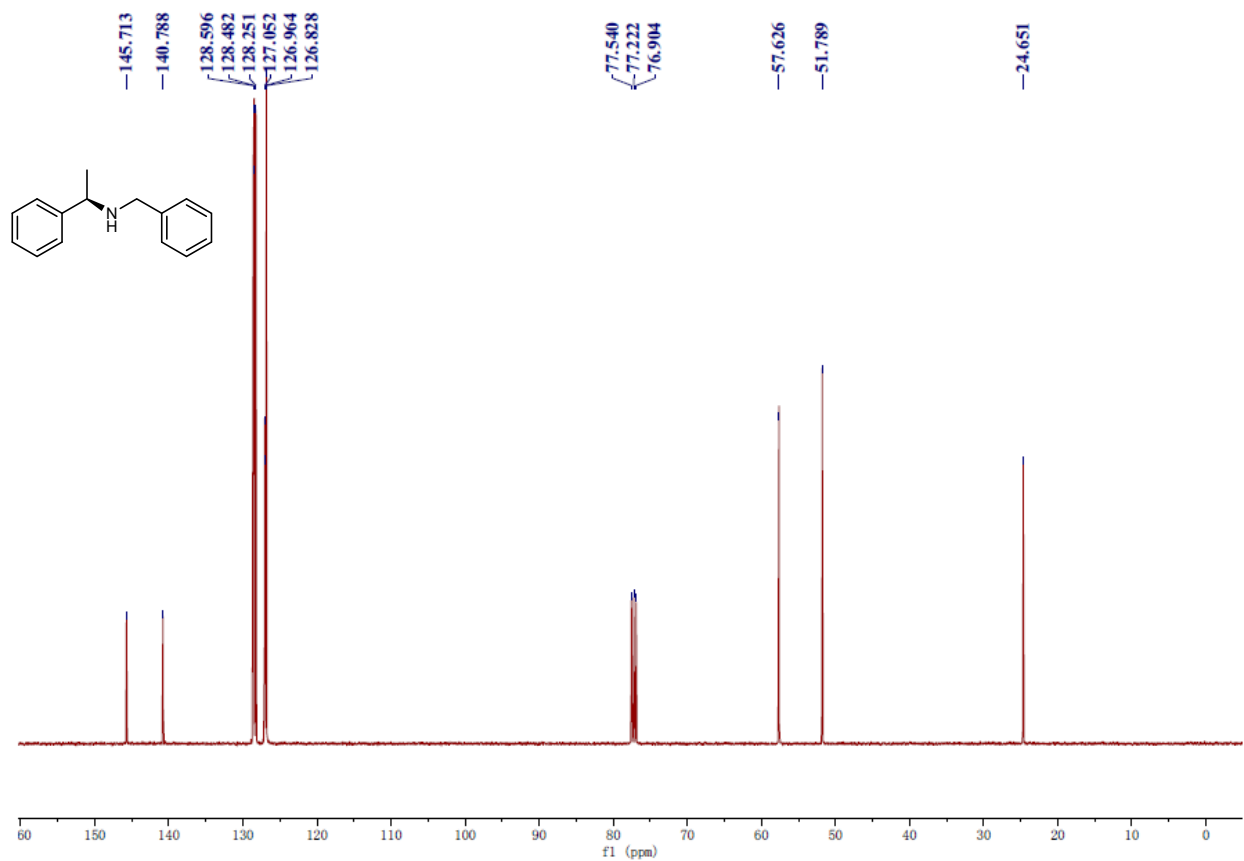

Supplementary Figure 21.  $^{13}\text{C}$  NMR spectrum of compound 5n.

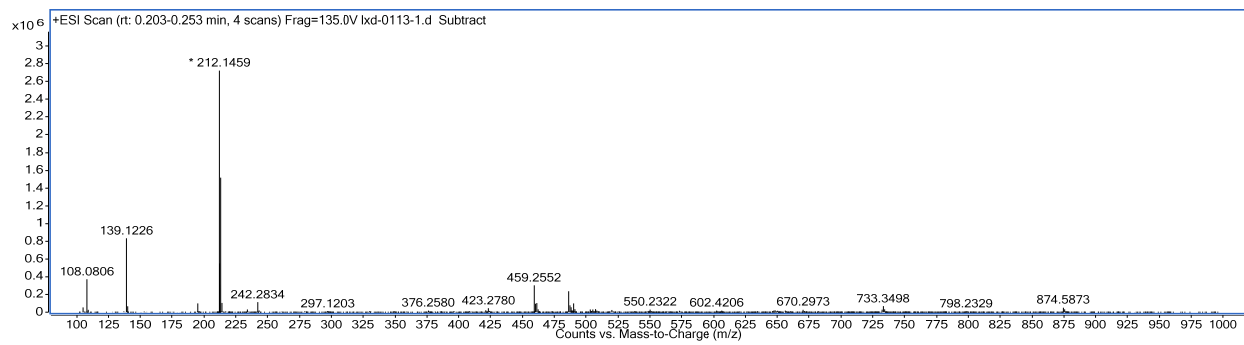

**Supplementary Figure 22.** HRMS of compound **5n**.

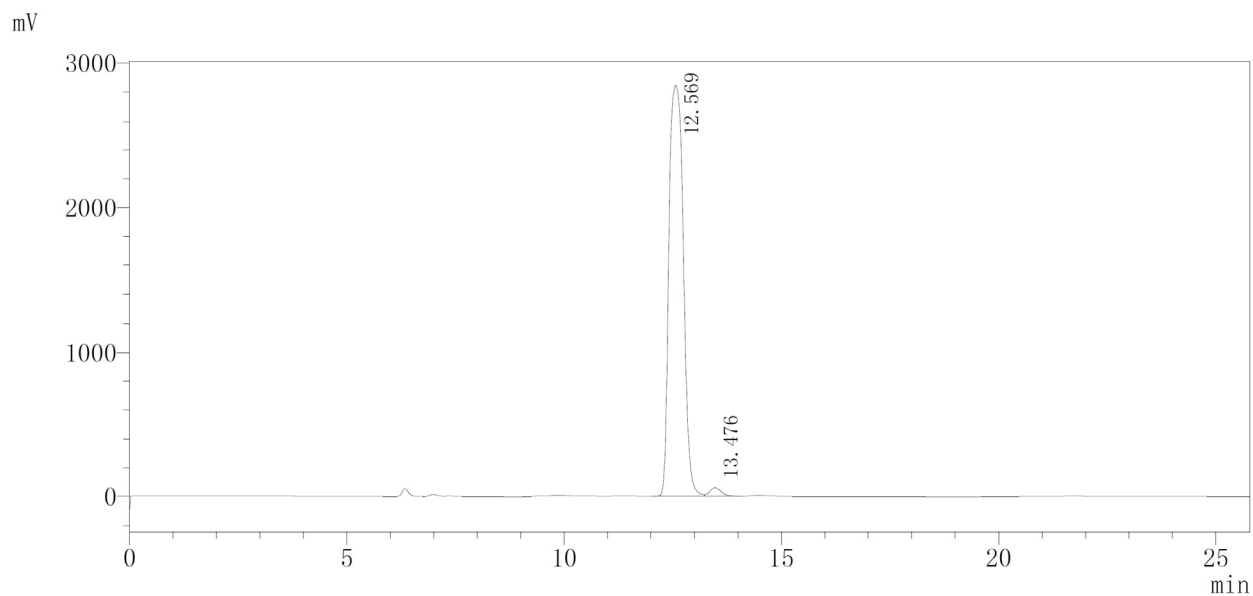

**Supplementary Figure 23.** Chiral HPLC data of compound **5n**. Peak 1: 12.596 min, area (65198511 mAU\*s), area percentage (98.364%); peak 2: 13.476 min, area (1084165 mAU\*s), area percentage (1.636%).

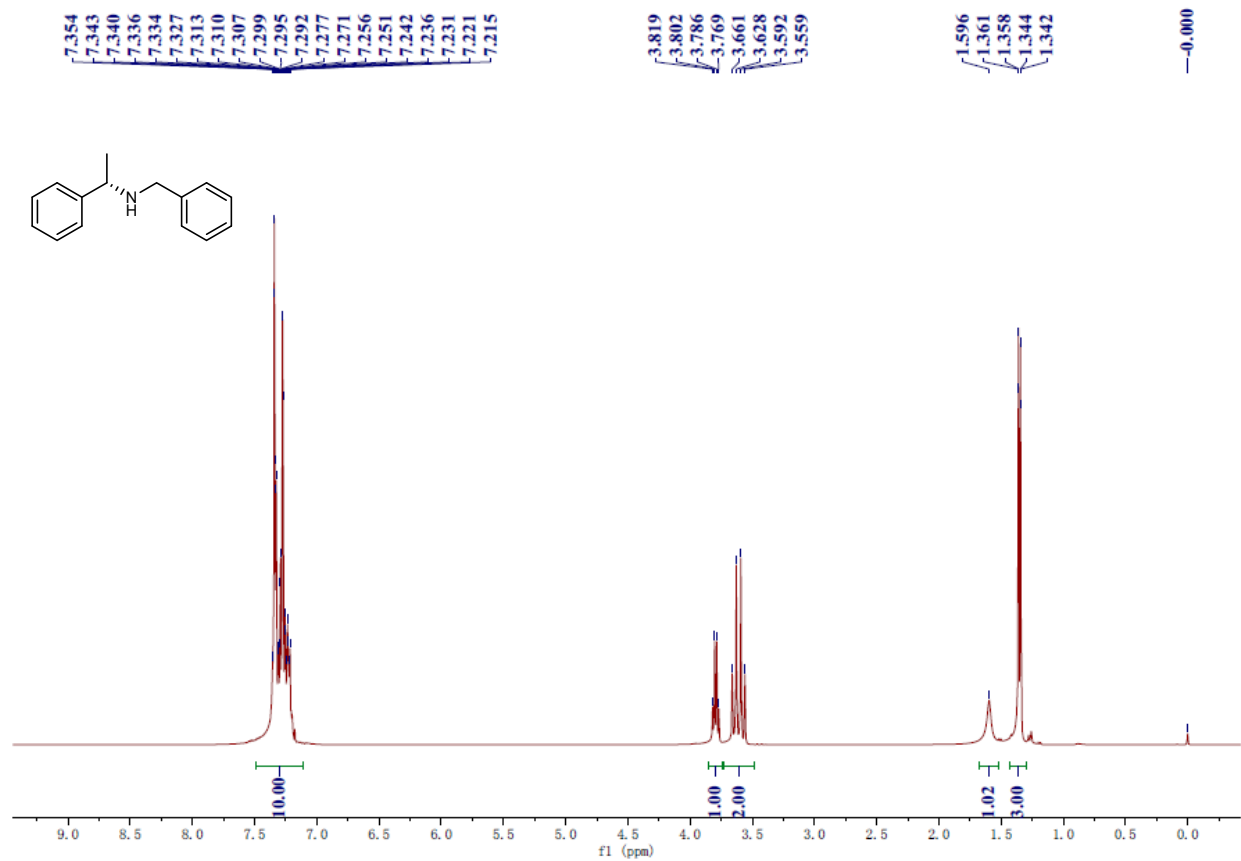

Supplementary Figure 24. <sup>1</sup>H NMR spectrum of compound 5o.

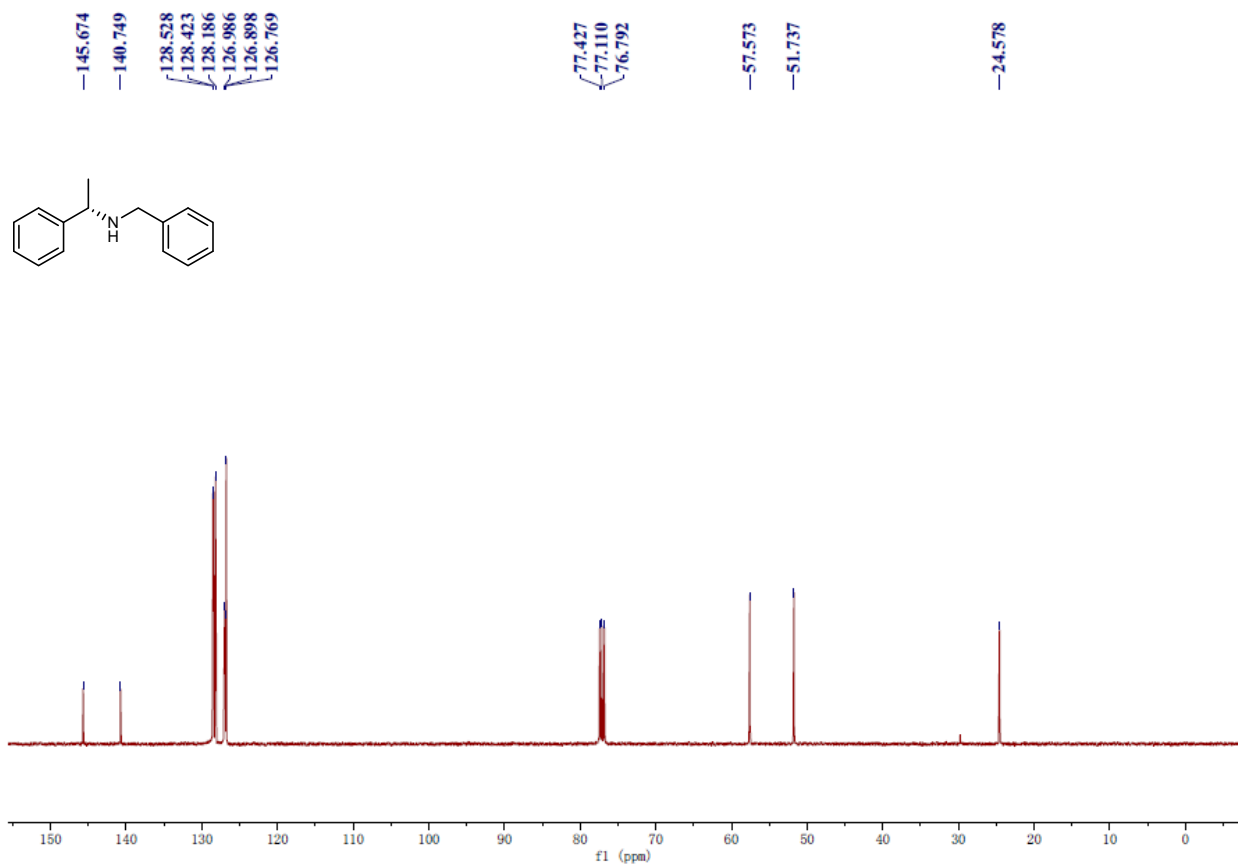

Supplementary Figure 25. <sup>13</sup>C NMR spectrum of compound 50.

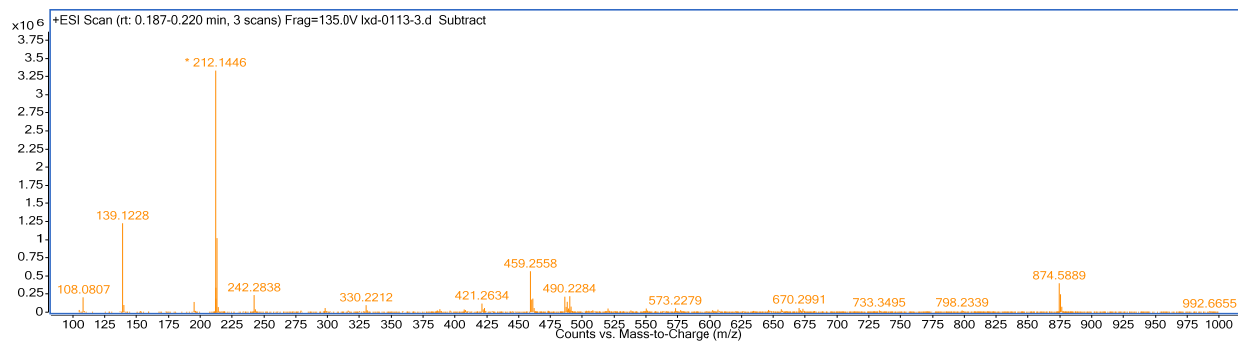

**Supplementary Figure 26.** HRMS of compound **50**.

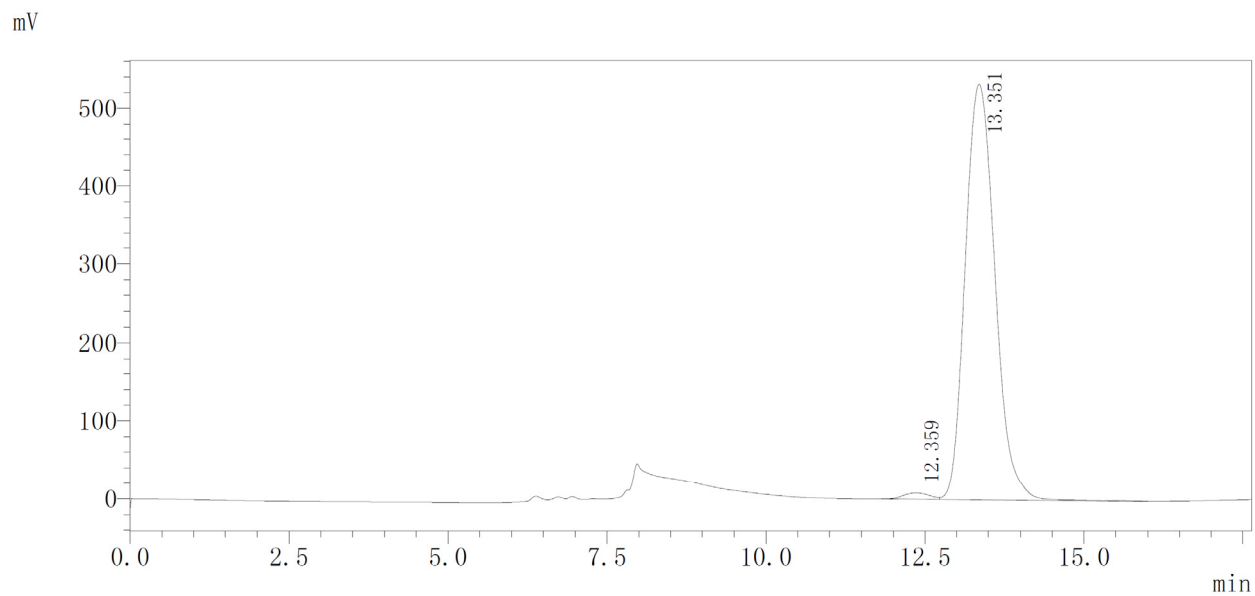

**Supplementary Figure 27.** Chiral HPLC data of compound **50**. Peak 1: 12.359 min, area (234963 mAU\*s), area percentage (1.339%); peak 2: 13.351 min, area (17318351 mAU\*s), area percentage (98.661%).



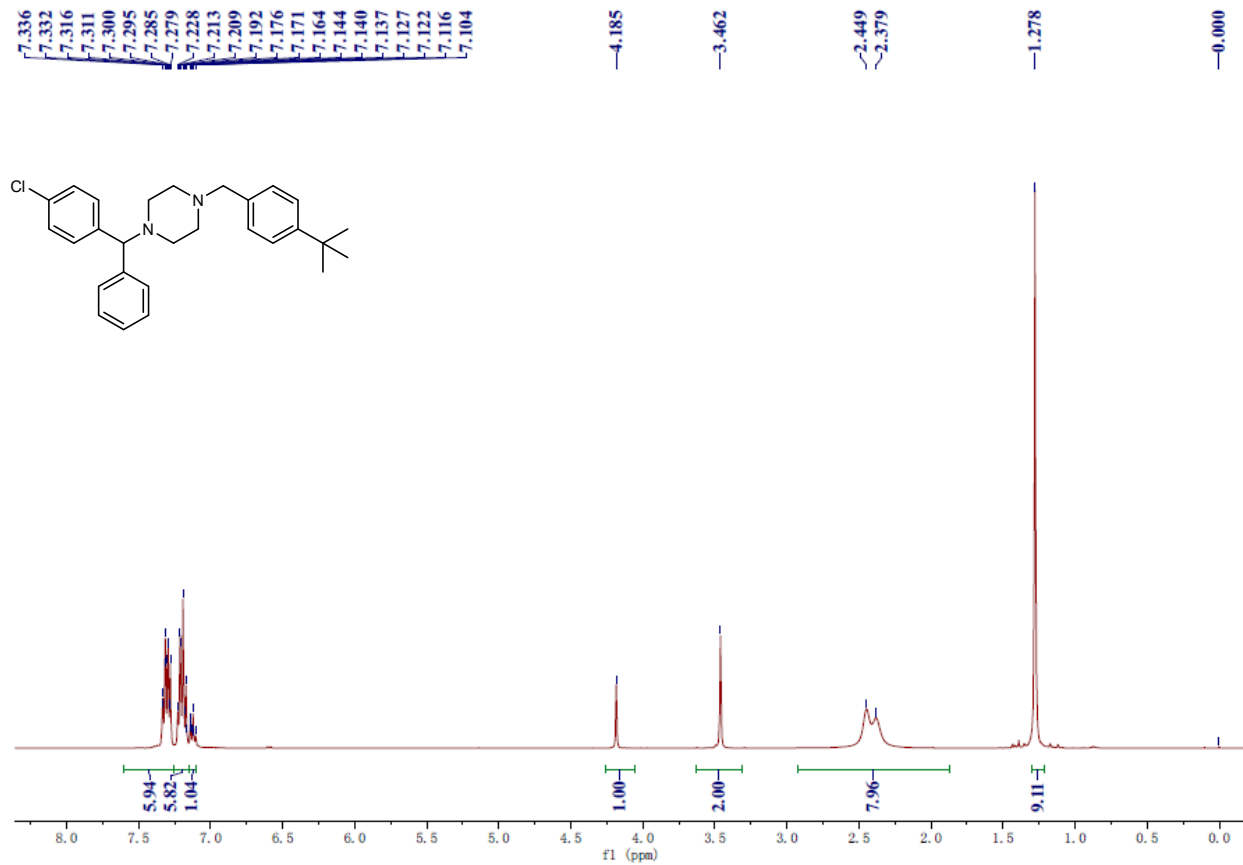

Supplementary Figure 28. <sup>1</sup>H NMR spectrum of compound 5p.

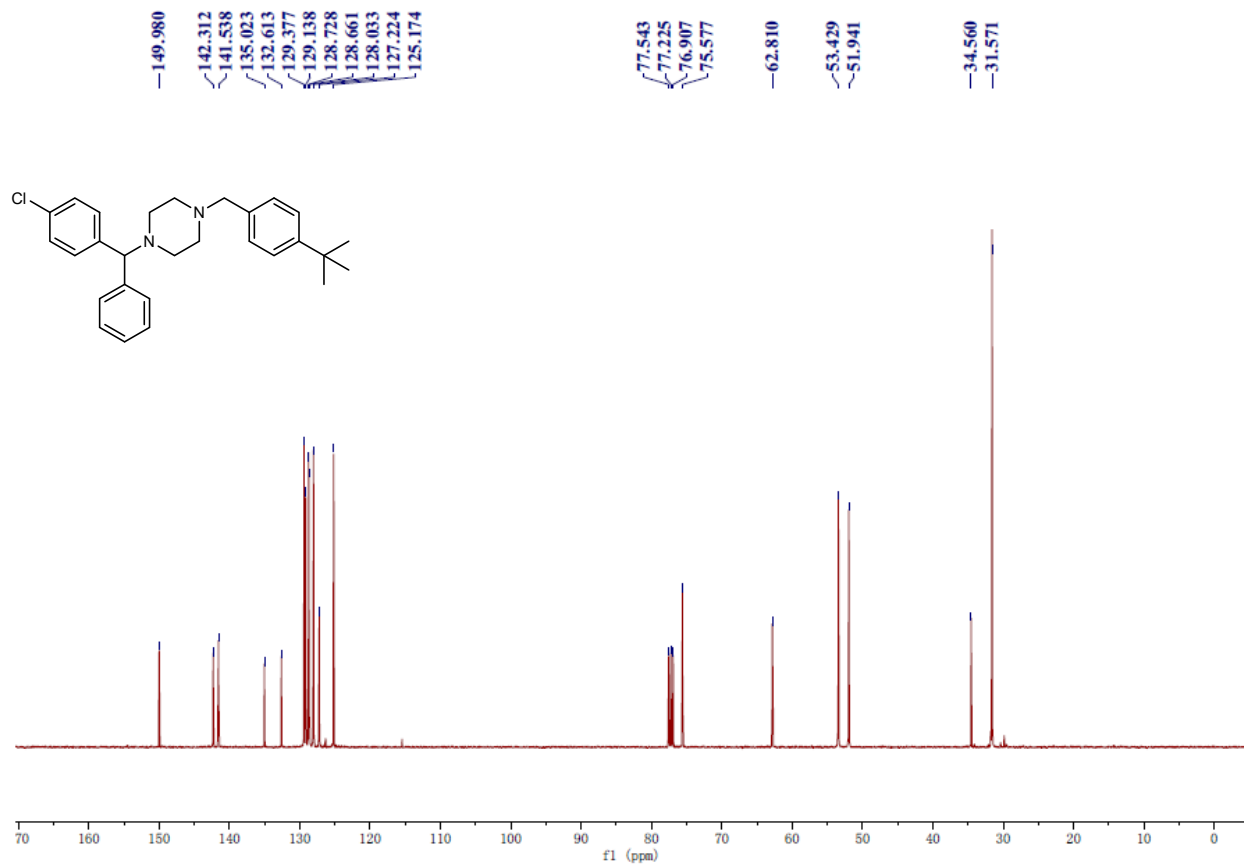

Supplementary Figure 29. <sup>13</sup>C NMR spectrum of compound 5p.

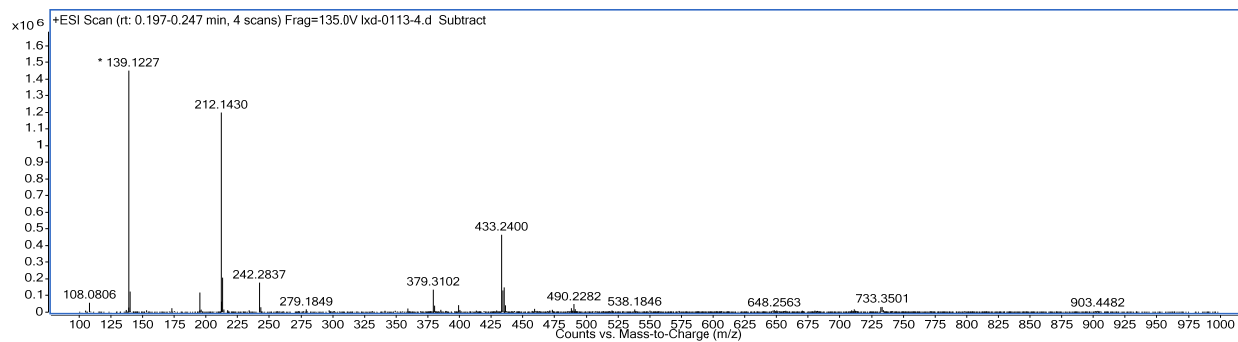

**Supplementary Figure 30.** HRMS of compound **5p**.

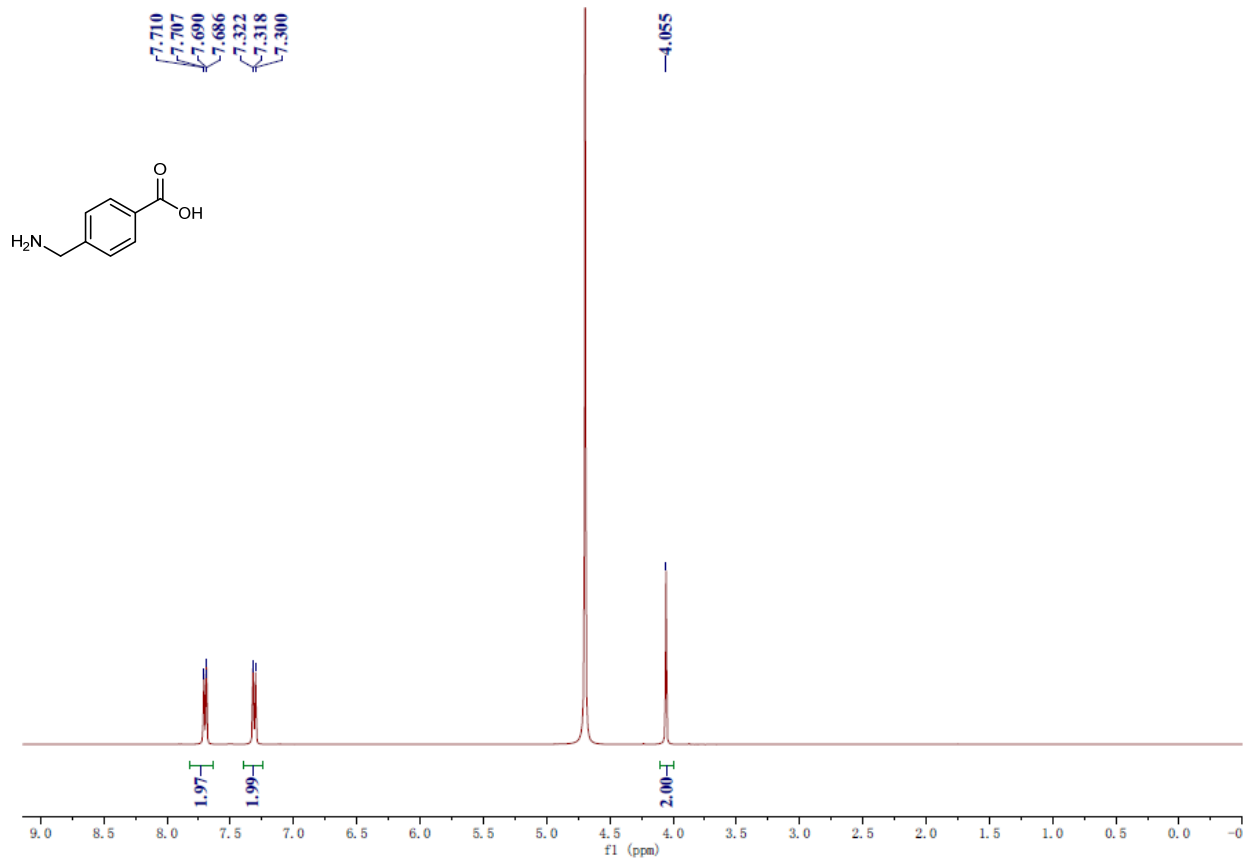

Supplementary Figure 31. <sup>1</sup>H NMR spectrum of compound 5q.

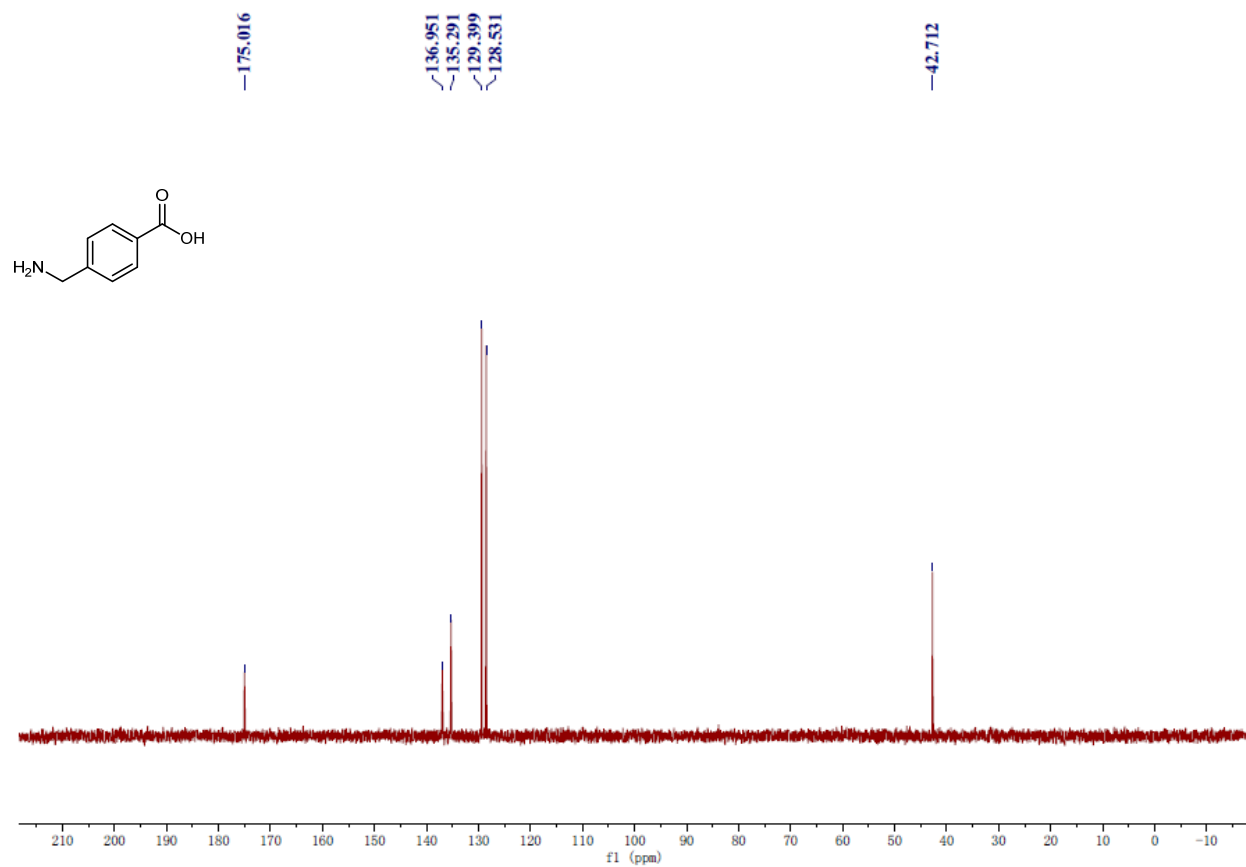

Supplementary Figure 32.  $^{13}\text{C}$  NMR spectrum of compound 5q.

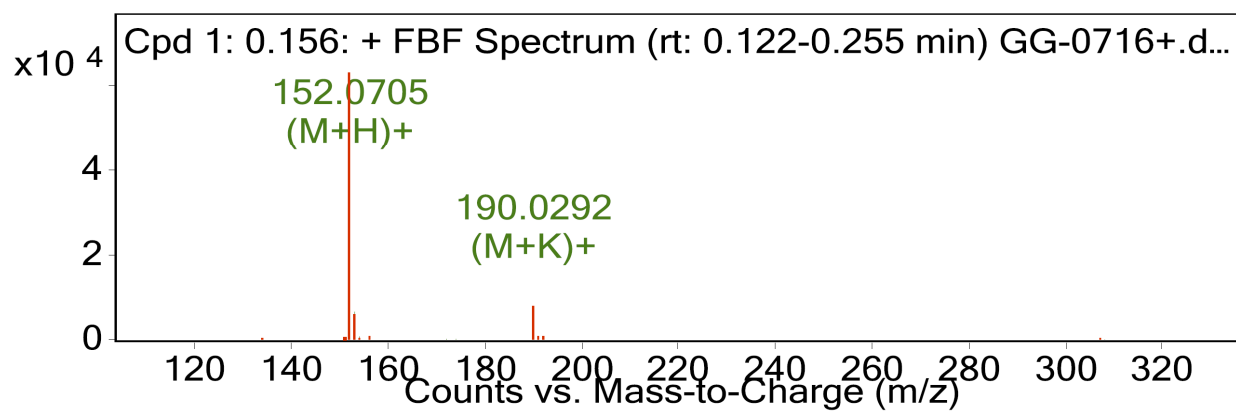

**Supplementary Figure 33.** HRMS of compound **5q**.

## Supplementary Tables

**Supplementary Table 1.** The contents of Fe in raw materials.

| Raw material                                          | Fe content (wt%)     |
|-------------------------------------------------------|----------------------|
| Silica colloid (Alfa Aesar)                           | $3.5 \times 10^{-4}$ |
| Sucrose (Macklin Biochemical Co. Ltd)                 | $9.3 \times 10^{-4}$ |
| Phytic acid solution (Aladdin Industrial Cooperation) | $9.2 \times 10^{-2}$ |
| Cyanamide (Alfa Aesar)                                | $1.5 \times 10^{-3}$ |

Determined by ICP-MS. Company name of purchased raw materials are shown in parenthesis.

**Supplementary Table 2.** The contents of Fe in the catalysts.

| Catalyst                         | Fe content (wt%)     |
|----------------------------------|----------------------|
| Fe-C <sub>900</sub> -PCC         | $1.6 \times 10^{-3}$ |
| Fe-N <sub>900</sub> -PCC         | $2.3 \times 10^{-3}$ |
| Fe-P <sub>900</sub> -PCC         | $7.1 \times 10^{-2}$ |
| Fe@Fe-C <sub>900</sub> -PCC      | $3.8 \times 10^{-2}$ |
| Fe@Fe-N <sub>900</sub> -PCC      | $5.7 \times 10^{-2}$ |
| P <sub>900</sub> -PCC-polymer    | $2.3 \times 10^{-5}$ |
| Fe-P <sub>900</sub> -PCC-polymer | $9.6 \times 10^{-2}$ |
| Fe-P <sub>700</sub> -PCC         | $7.2 \times 10^{-3}$ |
| Fe-P <sub>800</sub> -PCC         | $3.5 \times 10^{-2}$ |
| Fe-P <sub>1000</sub> -PCC        | $1.1 \times 10^{-1}$ |
| Fe-P <sub>1100</sub> -PCC        | $6.8 \times 10^{-2}$ |

Determined by ICP-MS.



**Supplementary Table 3.** Elemental compositions of catalysts (XPS results).

| Catalyst                   | XPS analysis (atomic %) |       |      |      |       |      |
|----------------------------|-------------------------|-------|------|------|-------|------|
|                            | C                       | O     | F    | Fe   | N     | P    |
| Fe-C <sub>900</sub> -PCC   | 91.02                   | 6.08  | 2.6  | 0.3  | -     | -    |
| Fe-N <sub>900</sub> -PCC   | 81.69                   | 6.24  | 0.92 | 0.16 | 10.99 | -    |
| Fe-P <sub>700</sub> -PCC   | 86.23                   | 10.66 | 0.91 | 0.16 | -     | 2.04 |
| Fe-P <sub>800</sub> -PCC   | 81.86                   | 12.97 | 1.43 | 0.26 | -     | 3.48 |
| Fe-P <sub>900</sub> -PCC   | 84.55                   | 11.55 | 0.96 | 0.20 | -     | 2.74 |
| Fe-P <sub>1000</sub> -PCC  | 86.81                   | 9.68  | 1.2  | 0.26 | -     | 2.04 |
| Fe-P <sub>1100</sub> -PCC  | 91.47                   | 6.45  | 1.01 | 0.15 | -     | 0.91 |
| Fe-P <sub>900</sub> -PCC-H | 93.05                   | 5.64  | 0.33 | 0.14 | -     | 0.98 |

**Supplementary Table 4.** Structural properties of the catalysts.

| Catalyst                  | $S_{\text{BET}}^{\dagger}$ ( $\text{m}^2\text{g}^{-1}$ ) | $S_{\text{micro}}^{\ddagger}$ ( $\text{m}^2\text{g}^{-1}$ ) | $V_{\text{pore}}^{\#}$ ( $\text{m}^3\text{g}^{-1}$ ) | $V_{\text{micro}}^{\S}$ ( $\text{m}^3\text{g}^{-1}$ ) | $D_{\text{pore}}^{\parallel}$ (nm) |
|---------------------------|----------------------------------------------------------|-------------------------------------------------------------|------------------------------------------------------|-------------------------------------------------------|------------------------------------|
| Fe-C <sub>900</sub> -PCC  | 768                                                      | 263                                                         | 1.34                                                 | 0.14                                                  | 12.7                               |
| Fe-N <sub>900</sub> -PCC  | 628                                                      | 193                                                         | 1.11                                                 | 0.10                                                  | 12.7                               |
| Fe-P <sub>900</sub> -PCC  | 511                                                      | 259                                                         | 1.32                                                 | 0.14                                                  | 17.2                               |
| Fe-P <sub>700</sub> -PCC  | 480                                                      | 243                                                         | 1.13                                                 | 0.13                                                  | 17.2                               |
| Fe-P <sub>800</sub> -PCC  | 496                                                      | 251                                                         | 1.29                                                 | 0.13                                                  | 17.2                               |
| Fe-P <sub>1000</sub> -PCC | 418                                                      | 167                                                         | 1.16                                                 | 0.09                                                  | 17.2                               |
| Fe-P <sub>1100</sub> -PCC | 615                                                      | 275                                                         | 1.45                                                 | 0.14                                                  | 17.2                               |

<sup>†</sup>BET surface area.

<sup>‡</sup>Micropore surface area.

<sup>#</sup>Total pore volume.

<sup>§</sup>Pore volume for micropores.

<sup>∥</sup>Mean pore diameter.

**Supplementary Table 5.** The contents of different P species in catalysts.

| Catalyst                      | Total P content (atomic %) | C-O-P (134.4 eV) |                    | C-PO <sub>3</sub> /C <sub>2</sub> -PO <sub>2</sub> (133.1 eV) |                    | P <sub>grap</sub> (132.1 eV) |                    |
|-------------------------------|----------------------------|------------------|--------------------|---------------------------------------------------------------|--------------------|------------------------------|--------------------|
|                               |                            | Percentage (%)   | Content (atomic %) | Percentage (%)                                                | Content (atomic %) | Percentage (%)               | Content (atomic %) |
| Fe-P <sub>700</sub> -PCC      | 2.04                       | 28.3             | 0.58               | 71.7                                                          | 1.46               | 0                            | 0                  |
| Fe-P <sub>800</sub> -PCC      | 3.48                       | 24.0             | 0.84               | 70.0                                                          | 2.43               | 6.0                          | 0.21               |
| Fe-P <sub>900</sub> -PCC      | 2.74                       | 27.2             | 0.75               | 57.8                                                          | 1.58               | 15.0                         | 0.41               |
| Fe-P <sub>1000</sub> -PCC     | 2.04                       | 31.2             | 0.64               | 51.4                                                          | 1.05               | 17.4                         | 0.35               |
| Fe-P <sub>1100</sub> -PCC     | 0.91                       | 23.1             | 0.21               | 54.2                                                          | 0.49               | 22.7                         | 0.21               |
| Fe-P <sub>900</sub> -PCC-H    | 0.98                       | 16.1             | 0.16               | 43.7                                                          | 0.43               | 40.2                         | 0.39               |
| Fe-P <sub>900</sub> -PCC-used | 1.51                       | 23.5             | 0.35               | 49.0                                                          | 0.75               | 27.5                         | 0.41               |

Content of P<sub>species</sub> (atomic %) = Total P content (atomic %) × Percentage of P<sub>species</sub> (%)

**Supplementary Table 6.** Fitting results of Fe K-edge EXAFS data for Fe@Fe-N<sub>900</sub>-PCC and Fe-P<sub>900</sub>-PCC.

| Sample                                   | Bond | CN        | R (Å)       | $\sigma^2$ (Å <sup>2</sup> ) | $\Delta E_0$ (eV) | R-factor |
|------------------------------------------|------|-----------|-------------|------------------------------|-------------------|----------|
| Fe@Fe-N <sub>900</sub> -PCC <sup>†</sup> | Fe-N | 4.2 ± 0.4 | 1.95 ± 0.01 | 0.007 ± 0.001                | -6.23 ± 1.1       | 0.004    |
| Fe-P <sub>900</sub> -PCC <sup>‡</sup>    | Fe-P | 4.0 ± 0.8 | 2.35 ± 0.02 | 0.014 ± 0.006                | -0.96 ± 0.3       | 0.013    |
|                                          | Fe-O | 2.0 ± 0.4 | 2.00 ± 0.03 | 0.004 ± 0.004                | -0.96 ± 0.3       |          |

The average lengths of Fe-N, Fe-P and Fe-O bonds and coordination numbers of Fe atoms are extracted from the curve fitting for Fe K-edge EXAFS data. CN, coordination number; R, distance between absorber and backscatter atoms;  $\sigma^2$ , the Debye-Waller factor;  $\Delta E_0$ , inner potential correction; R-factor, indicate the goodness of the fit.

<sup>†</sup>For the EXAFS spectrum of Fe@Fe-N<sub>900</sub>-PCC (Supplementary Fig. 14), only a strong Fe-N peak at 1.45 Å is observed. So, the fitting was performed by including a single Fe-N shell within the R-rang of 1.0 - 3.1 Å and *k*-rang of 1.42 Å<sup>-1</sup> - 9.62 Å<sup>-1</sup>. The fitting results reveal that the coordination number of Fe center with surrounding N atoms is 4.2 ± 0.4 and the average Fe-N bond length is 1.95 ± 0.01 Å, suggesting the single Fe sites in Fe@Fe-N<sub>900</sub>-PCC adopt a planar Fe-N<sub>4</sub> structure (as presented in Supplementary Fig. 14b).

<sup>‡</sup>The EXAFS spectrum of Fe-P<sub>900</sub>-PCC shows that the main peak locates at 1.63 Å, ascribing to Fe-P first shell coordination. Furthermore, the Fe-O first shell coordination at 1.45 Å is also included in this broadening peak, which indicates that O need to be included in the curve fitting. On the other hand, a shoulder peak at 2.55 Å for Fe-C second shell coordination is also observed. Therefore, a three-shell structure model, including a Fe-P, a Fe-O and a Fe-C shell, is initially used to fit the EXAFS data of Fe-P<sub>900</sub>-PCC within the R-rang of 1.0 - 3.1 Å and *k*-rang of 1.42 - 9.62 Å<sup>-1</sup>. The best-fitting analyses manifests that the dominant contribution is given by Fe-P and Fe-O first shell coordination as presented in Manuscript Fig. 3c and 3d. The coordination numbers for P and O atoms are calculated as 4.0 ± 0.8 and 2.0 ± 0.4, and the corresponding mean bond length of Fe-P and Fe-O are 2.35 ± 0.02 Å and 2.00 ± 0.03 Å, respectively. These results reveal that the single Fe atom in Fe-P<sub>900</sub>-PCC coordinates with four P atoms and a dioxygen molecule (O<sub>2</sub>-Fe-P<sub>4</sub>). Because the atomic size of P (106 pm) is larger than C (75 pm), Fe center adopts a pyramidal geometry as shown in Manuscript Fig. 3e, this configuration is quite different from the planar structure of Fe-N<sub>4</sub>.

**Supplementary Table 7.** Hydrogenation of quinoline catalyzed by Fe<sub>x</sub>/Fe-P<sub>900</sub>-PCC.

| 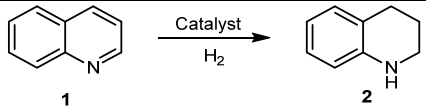 |                                              |                  |                |           |
|------------------------------------------------------------------------------------|----------------------------------------------|------------------|----------------|-----------|
| Entry                                                                              | Catalyst                                     | Temperature (°C) | Conversion (%) | Yield (%) |
| 1                                                                                  | Fe <sub>0.11</sub> /Fe-P <sub>900</sub> -PCC | 150              | 19             | 18        |
| 2                                                                                  | Fe <sub>0.2</sub> /Fe-P <sub>900</sub> -PCC  | 150              | 13             | 11        |
| 3                                                                                  | Fe <sub>0.4</sub> /Fe-P <sub>900</sub> -PCC  | 150              | 7              | 7         |
| 4                                                                                  | Fe <sub>0.95</sub> /Fe-P <sub>900</sub> -PCC | 150              | 5              | 5         |

Reaction conditions: 1 mmol quinoline, 100 mg catalyst, 2 mL solvent (heptane), 4 MPa H<sub>2</sub>, 12 h. The conversion and yield were determined by GC using dodecane as an internal standard.

**Supplementary Table 8.** Step by step barrier ( $E_a$ , eV) and reaction energy ( $E_r$ , eV) for hydrogenation of quinoline ( $C_9H_7N$ ) over Fe-P<sub>900</sub>-PCC.

| Number | Reactions                                              | $E_a$ (eV) | $E_r$ (eV) |
|--------|--------------------------------------------------------|------------|------------|
| 1      | $H_2(g) \rightarrow H_2^*$                             | -          | -0.407     |
| 2      | $C_9H_7N + H_2^* \rightarrow C_9H_7N^* + H_2^*$        | -          | -0.687     |
| 3      | $C_9H_7N^* + H_2^* \rightarrow C_9H_8N^* + H(Fe)^*$    | 0.220      | -0.004     |
| 4      | $C_9H_8N^* + H(Fe)^* \rightarrow C_9H_9N^*$            | 0.380      | -0.348     |
| 5      | $C_9H_9N^* + H_2(g) \rightarrow C_9H_9N^* + H_2^*$     | -          | -0.025     |
| 6      | $C_9H_9N^* + H_2^* \rightarrow C_9H_{10}N^* + H(Fe)^*$ | 0.728      | 0.432      |
| 7      | $C_9H_{10}N^* + H(Fe)^* \rightarrow C_9H_{11}N$        | 0.132      | -1.331     |

**Supplementary Table 9.** The energies of species in the processes of hydrogenation of quinoline (C<sub>9</sub>H<sub>7</sub>N).

| Label | Species                                              | E (eV)   | E <sub>rel</sub> (eV) <sup>†</sup> |
|-------|------------------------------------------------------|----------|------------------------------------|
| IS    | C <sub>9</sub> H <sub>7</sub> N + H <sub>2</sub> (g) | -635.885 | 0.000                              |
| int-1 | C <sub>9</sub> H <sub>7</sub> N + H <sub>2</sub> *   | -643.051 | -0.407                             |
| int-2 | C <sub>9</sub> H <sub>7</sub> N* + H <sub>2</sub> *  | -758.800 | -1.094                             |
| TS1   | -                                                    | -        | -                                  |
| int-3 | C <sub>9</sub> H <sub>8</sub> N* + H(Fe)*            | -758.804 | -1.098                             |
| TS2   | -                                                    | -        | -                                  |
| int-4 | C <sub>9</sub> H <sub>9</sub> N*                     | -759.152 | -1.446                             |
| int-5 | C <sub>9</sub> H <sub>9</sub> N* + H <sub>2</sub> *  | -765.936 | -1.471                             |
| TS3   | -                                                    | -        | -                                  |
| int-6 | C <sub>9</sub> H <sub>10</sub> N* + H(Fe)*           | -765.504 | -1.039                             |
| TS4   | -                                                    | -        | -                                  |
| int-7 | C <sub>9</sub> H <sub>11</sub> N                     | -766.836 | -2.370                             |
| FS    | -                                                    | -635.885 | -1.801                             |

<sup>†</sup>The E<sub>rel</sub> refers to the energy of species labelled IS.

IS: initial state. int: intermediate. TS: transition state. FS: final state.

**Supplementary Table 10.** Catalytic performances for non-precious metal catalyzed heterogeneous hydrogenation of quinoline in earlier literatures.

| Entry | Catalyst                                                                | NP <sup>†</sup> /<br>SA <sup>‡</sup> | Reaction<br>conditions                                            | Yield<br>(%) | TOF <sup>#</sup><br>(h <sup>-1</sup> ) | Ref.             |
|-------|-------------------------------------------------------------------------|--------------------------------------|-------------------------------------------------------------------|--------------|----------------------------------------|------------------|
| 1     | Fe-P <sub>900</sub> -PCC                                                | SA                                   | 150 °C, heptane, 4 MPa H <sub>2</sub> , 12 h                      | 92           | 60.4                                   | This work        |
| 2     | Co <sub>3</sub> O <sub>4</sub> -Co/NGr@α-Al <sub>2</sub> O <sub>3</sub> | NP                                   | 120 °C, toluene, 2 MPa H <sub>2</sub> , 48 h                      | 98           | 0.5                                    | Ref <sup>1</sup> |
| 3     | Co <sub>1</sub> /h-NC                                                   | SA                                   | 120 °C, THF, 3.5 MPa H <sub>2</sub> , 10 h                        | 56           | 5.6                                    | Ref <sup>2</sup> |
| 4     | Co@NGS-800-NL                                                           | NP                                   | 140 °C, isopropanol, 4 MPa H <sub>2</sub> , 24 h                  | 96           | 0.4                                    | Ref <sup>3</sup> |
| 5     | CoO <sub>x</sub> @CN                                                    | NP                                   | 120 °C, methanol, 3.5 MPa H <sub>2</sub> , 3 h                    | 91           | 6.6                                    | Ref <sup>4</sup> |
| 6     | Fe(1)/L4(4.5)@C-800(12)                                                 | NP                                   | 130 °C, isopropanol-H <sub>2</sub> O, 4 MPa H <sub>2</sub> , 56 h | 87           | 0.1                                    | Ref <sup>5</sup> |
| 7     | Ni NPs/[BMIM][Pro]                                                      | NP                                   | 75 °C, ethanol, 3 MPa H <sub>2</sub> , 10 h                       | 99           | 28.8                                   | Ref <sup>6</sup> |

<sup>†</sup>Nanoparticle catalyst

<sup>‡</sup>Single atom catalyst

<sup>#</sup>TOF = mol<sub>yield of tetrahydroquinoline</sub> / (mol<sub>metal</sub> • h)



**Supplementary Table 11.** Catalytic performances for non-precious metal catalyzed heterogeneous hydrogenation of nitrobenzene in earlier literatures.

| Entry | Catalyst                                      | NP <sup>†</sup> /SA <sup>‡</sup> | Reaction conditions                                           | Yield (%) | TOF <sup>#</sup> (h <sup>-1</sup> ) | Ref.              |
|-------|-----------------------------------------------|----------------------------------|---------------------------------------------------------------|-----------|-------------------------------------|-------------------|
| 1     | Fe-P <sub>900</sub> -PCC                      | SA                               | 100 °C, toluene, 4 MPa H <sub>2</sub> , 18 h                  | 99        | 43.7                                | This work         |
| 2     | Fe-phen/C-800                                 | NP                               | 120 °C, H <sub>2</sub> O-THF, 5 MPa H <sub>2</sub> , 15 h     | 98        | 1.5                                 | Ref <sup>7</sup>  |
| 3     | Co-L1/carbon                                  | NP                               | 110 °C, H <sub>2</sub> O, 5 MPa H <sub>2</sub> , 4 h          | 99        | 24.8                                | Ref <sup>8</sup>  |
| 4     | Co@mesoNC                                     | SA                               | 110 °C, ethanol, 3 MPa H <sub>2</sub> , 2 h                   | 55        | 42                                  | Ref <sup>9</sup>  |
| 5     | Co-SiCN                                       | NP                               | 110 °C, ethanol-H <sub>2</sub> O, 5 MPa H <sub>2</sub> , 15 h | 99        | 1.4                                 | Ref <sup>10</sup> |
| 6     | CoO <sub>x</sub> @NCNTs                       | NP                               | 110 °C, ethanol, 3 MPa H <sub>2</sub> , 3 h                   | 99        | 8.3                                 | Ref <sup>11</sup> |
| 7     | Co <sub>3</sub> O <sub>4</sub> /NGr@C         | NP                               | 110 °C, THF-H <sub>2</sub> O, 5 MPa H <sub>2</sub> , 4 h      | 95        | 25                                  | Ref <sup>12</sup> |
| 8     | Fe-N-C@CNTs-1.5                               | NP                               | 110 °C, THF-H <sub>2</sub> O, 5 MPa H <sub>2</sub> , 6 h      | 99        | 46.8                                | Ref <sup>13</sup> |
| 9     | Fe <sub>3</sub> C@G-CNT-700                   | NP                               | 40 °C, ethanol, 2 MPa H <sub>2</sub> , 4.5 h                  | 98        | 22                                  | Ref <sup>14</sup> |
| 10    | Fe/N-C-500                                    | NP                               | 120 °C, ethyl acetate, 4 MPa H <sub>2</sub> , 15 h            | 99        | 0.6                                 | Ref <sup>15</sup> |
| 11    | Co-Co <sub>3</sub> O <sub>4</sub> @carbon-700 | NP                               | 110 °C, ethanol-H <sub>2</sub> O, 4 MPa H <sub>2</sub> , 15 h | 99        | 3.9                                 | Ref <sup>16</sup> |
| 12    | Fe <sub>2</sub> O <sub>3</sub> @G-C-900       | NP                               | 70 °C, ethanol, 2 MPa H <sub>2</sub> , 2 h                    | 95        | 46.6                                | Ref <sup>17</sup> |
| 13    | Co@NC-800                                     | NP                               | 110 °C, ethanol, 3 MPa H <sub>2</sub> , 3 h                   | 99        | 8                                   | Ref <sup>18</sup> |
| 14    | Co@NMC-800                                    | NP                               | 80 °C, ethanol, 1 MPa H <sub>2</sub> , 80 min                 | 99        | 37.5                                | Ref <sup>19</sup> |
| 15    | Co <sub>2</sub> P/CN <sub>x</sub>             | NP                               | 60 °C, THF-H <sub>2</sub> O, 5 MPa H <sub>2</sub> , 6 h       | 99        | 1.5                                 | Ref <sup>20</sup> |
| 16    | Zr <sub>12</sub> -TPDC-CoCl                   | SA                               | 110 °C, toluene, 4 MPa H <sub>2</sub> , 42 h                  | 99        | 4.8                                 | Ref <sup>21</sup> |
| 17    | Ni/SiO <sub>2</sub>                           | NP                               | 110 °C, ethanol, 2.5 MPa H <sub>2</sub> , 7 h                 | 99        | 1.2                                 | Ref <sup>22</sup> |
| 18    | Ni@PS <sub>60</sub> SiCN                      | NP                               | 110 °C, ethanol-H <sub>2</sub> O, 5 MPa H <sub>2</sub> , 20 h | 99        | 5                                   | Ref <sup>23</sup> |
| 19    | 7.2%Ni/Mo <sub>2</sub> C                      | NP                               | 80 °C, ethanol-H <sub>2</sub> O, 2 MPa H <sub>2</sub> , 1.5 h | 99        | 32.3                                | Ref <sup>24</sup> |
| 20    | Ni/C-300                                      | NP                               | 140 °C, ethanol, 2 MPa H <sub>2</sub> , 2 h                   | 71        | 17.7                                | Ref <sup>25</sup> |
| 21    | Ni/AC <sub>OX</sub>                           | NP                               | 40 °C, toluene, 0.3 MPa H <sub>2</sub> , 190 min              | 95        | 1.8                                 | Ref <sup>26</sup> |
| 22    | 30.0 wt% Ni/C <sub>60</sub> -Ac-B-4           | NP                               | 110 °C, ethanol, 2 MPa H <sub>2</sub> , 5 h                   | 99        | 6.3                                 | Ref <sup>27</sup> |
| 23    | Ni-NiO/NGr@C                                  | NP                               | 110 °C, THF-H <sub>2</sub> O, 5 MPa H <sub>2</sub> , 8 h      | 98        | 2.5                                 | Ref <sup>28</sup> |
| 24    | Ni/NGr@OMC-800                                | NP                               | 100 °C, H <sub>2</sub> O, 5 MPa H <sub>2</sub> , 2 h          | 99        | 17.2                                | Ref <sup>29</sup> |
| 25    | Ni-phen@SiO <sub>2</sub> -1000                | NP                               | 40 °C, methanol-H <sub>2</sub> O, 1 MPa H <sub>2</sub> , 20 h | 99        | 1.3                                 | Ref <sup>30</sup> |

<sup>†</sup>Nanoparticle catalyst

<sup>‡</sup>Single atom catalyst

<sup>#</sup>TOF = mol<sub>yield of aniline</sub> / (mol<sub>metal</sub> • h)

**Supplementary Table 12.** Catalytic performances for non-precious metal catalyzed heterogeneous reductive amination of carbonyl compounds in earlier literatures.

| Entry           | Catalyst                               | NP <sup>†</sup> /SA <sup>‡</sup> | Reaction conditions                                     | Yield (%) | TOF <sup>#</sup> (h <sup>-1</sup> ) | Ref.              |
|-----------------|----------------------------------------|----------------------------------|---------------------------------------------------------|-----------|-------------------------------------|-------------------|
| 1 <sup>a</sup>  | Fe-P <sub>900</sub> -PCC               | SA                               | 75 °C, H <sub>2</sub> O, 6 MPa H <sub>2</sub> , 30 h    | 98        | 173                                 | This work         |
| 2 <sup>b</sup>  | Co-DABCO-TPA@C-800                     | NP                               | 120 °C, t-BuOH, 4 MPa H <sub>2</sub> , 15 h             | 88        | 1.7                                 | Ref <sup>31</sup> |
| 3 <sup>c</sup>  | Ni-TA@SiO <sub>2</sub> -800            | NP                               | 120 °C, t-BuOH, 2 MPa H <sub>2</sub> , 24 h             | 98        | 0.7                                 | Ref <sup>32</sup> |
| 4 <sup>d</sup>  | Ni/gama-Al <sub>2</sub> O <sub>3</sub> | NP                               | 80 °C, H <sub>2</sub> O, 1 MPa H <sub>2</sub> , 20 h    | 99        | 4.2                                 | Ref <sup>33</sup> |
| 5 <sup>e</sup>  | Fe/(N)SiC                              | NP                               | 130 °C, H <sub>2</sub> O, 6.5 MPa H <sub>2</sub> , 20 h | 89        | 0.4                                 | Ref <sup>34</sup> |
| 6 <sup>f</sup>  | Fe/(N)SiC                              | NP                               | 140 °C, H <sub>2</sub> O, 6.5 MPa H <sub>2</sub> , 20 h | 99        | 0.5                                 | Ref <sup>34</sup> |
| 7 <sup>g</sup>  | Co/N-C-800                             | NP                               | 110 °C, H <sub>2</sub> O, 0.5 MPa H <sub>2</sub> , 4 h  | 92        | 1.8                                 | Ref <sup>35</sup> |
| 8 <sup>h</sup>  | Raney Ni                               | -                                | 120 °C, methanol, 1 MPa H <sub>2</sub> , 2 h            | 65        | 1.0                                 | Ref <sup>36</sup> |
| 9 <sup>i</sup>  | Raney Co                               | -                                | 120 °C, methanol, 1 MPa H <sub>2</sub> , 2 h            | 98        | 3.1                                 | Ref <sup>36</sup> |
| 10 <sup>j</sup> | Ni <sub>6</sub> AlO <sub>x</sub>       | NP                               | 100 °C, H <sub>2</sub> O, 0.1 MPa H <sub>2</sub> , 6 h  | 99        | 0.3                                 | Ref <sup>37</sup> |
| 11 <sup>k</sup> | Co@NC-800                              | NP                               | 130 °C, ethanol, 1 MPa H <sub>2</sub> , 12 h            | 97        | 11.9                                | Ref <sup>38</sup> |

<sup>†</sup>Nanoparticle catalyst

<sup>‡</sup>Single atom catalyst

<sup>#</sup>TOF = mol<sub>yield of product</sub> / (mol<sub>metal</sub> • h)

<sup>a</sup>Substrate: R<sup>1</sup> = COOH, R<sup>2</sup> = H

<sup>b</sup>Substrate: R<sup>1</sup> = COOCH<sub>3</sub>, R<sup>2</sup> = H

<sup>c</sup>Substrate: R<sup>1</sup> = CH<sub>3</sub>, R<sup>2</sup> = H

<sup>d</sup>Substrate: R<sup>1</sup> = H, R<sup>2</sup> = H

<sup>e</sup>Substrate: R<sup>1</sup> = H, R<sup>2</sup> = H

<sup>f</sup>Substrate: R<sup>1</sup> = H, R<sup>2</sup> = CH<sub>3</sub>

<sup>g</sup>Substrate: R<sup>1</sup> = H, R<sup>2</sup> = H

<sup>h</sup>Substrate: 2-furaldehyde

<sup>i</sup>Substrate: 2-furaldehyde

<sup>j</sup>Substrate: 5-hydroxymethylfurfural

<sup>k</sup>Substrate: R<sup>1</sup> = H, R<sup>2</sup> = H

## Supplementary Methods

$^1\text{H}$  NMR and  $^{13}\text{C}$  NMR spectra were recorded at room temperature on Zhongke-Niujin 400 using  $\text{CDCl}_3$ ,  $\text{D}_2\text{O}$  solvents. High resolution mass spectra (HRMS) were tested on Agilent 6530 Accurate-Mass Q-TOF LC/MS with ESI mode. High Performance Liquid Chromatography (HPLC) analysis for the ee values was performed on a SHIMADZU system (SHIMADZU LC-20AT pump, SHIMADZU LC-20A Absorbance Detector).

### (R)-N-benzyl-1-phenylethan-1-amine (5n)

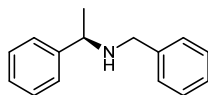

$^1\text{H}$  NMR (400 MHz,  $\text{CDCl}_3$ ) 7.35-7.21(m, 10H), 3.79 (q,  $J$  = 6.6 Hz, 1H), 3.69 – 3.53 (m, 2H), 1.59 (s, 1H), 1.34 (d,  $J$  = 6.6 Hz, 3H).  $^{13}\text{C}$  NMR (101 MHz,  $\text{CDCl}_3$ )  $\delta$  145.71, 140.79, 128.60, 128.48, 128.25, 127.05, 126.96, 126.83, 57.63, 51.79, 24.65. HRMS (ESI) Calcd for  $\text{C}_{15}\text{H}_{17}\text{N}$   $[\text{M}+\text{H}]^+$  212.1439; found 212.1459. HPLC (Daicel Chiralcel OD-H, 25 °C, n-heptane/i-PrOH = 99/1, flow rate 0.5 mL/min,  $\lambda$  = 210 nm). Colorless oil.

### (S)-N-benzyl-1-phenylethan-1-amine (5o)

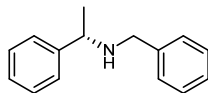

$^1\text{H}$  NMR (400 MHz,  $\text{CDCl}_3$ )  $\delta$  7.35-7.21 (m, 10H), 3.79 (q,  $J$  = 6.6 Hz, 1H), 3.61 (q,  $J$  = 13.1 Hz, 2H), 1.60 (s, 1H), 1.35 (dd,  $J$  = 6.6, 1.0 Hz, 3H).  $^{13}\text{C}$  NMR (101 MHz,  $\text{CDCl}_3$ )  $\delta$  145.67, 140.75, 128.53, 128.42, 128.19, 126.99, 126.90, 126.77, 57.57, 51.74, 24.58. HRMS (ESI) Calcd for  $\text{C}_{15}\text{H}_{17}\text{N}$   $[\text{M}+\text{H}]^+$  212.1439; found 212.1446. HPLC (Daicel Chiralcel OD-H, 25 °C, n-heptane/i-PrOH = 99/1, flow rate 0.5 mL/min,  $\lambda$  = 210 nm). Colorless oil.

### 1-(4-(tert-butyl)benzyl)-4-((4-chlorophenyl)(phenyl)methyl)piperazine (5p)

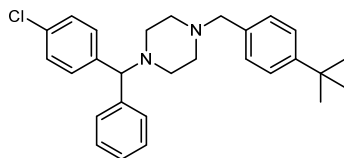

$^1\text{H}$  NMR (400 MHz,  $\text{CDCl}_3$ )  $\delta$  7.34-7.28 (m, 6H), 7.25 - 7.15 (m, 6H), 7.15 - 7.10 (m, 1H), 4.18 (s, 1H), 3.46 (s, 2H), 2.41 (d,  $J$  = 27.7 Hz, 8H), 1.28 (s, 9H).  $^{13}\text{C}$  NMR (101 MHz,  $\text{CDCl}_3$ )  $\delta$  149.98, 142.31, 141.54, 135.02, 132.61, 129.38, 129.14, 128.73, 128.66, 128.03, 127.22, 125.17, 75.58, 62.81, 53.43, 51.94, 34.56, 31.57. HRMS (ESI) Calcd for  $\text{C}_{28}\text{H}_{33}\text{ClN}_2$   $[\text{M}+\text{H}]^+$  433.2411; found 433.2400. Brown gum.

**4-(aminomethyl)benzoic acid (5q)**

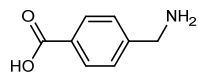

**<sup>1</sup>H NMR (400 MHz, D<sub>2</sub>O)** δ 7.71-7.86(m, 2H), 7.32-7.30(m,2H), 4.06(s,2H). **<sup>13</sup>C NMR (101 MHz, D<sub>2</sub>O)** 175.02, 136.95, 135.29, 129.40, 128.53, 42.71. **HRMS (ESI)** Calcd for C<sub>8</sub>H<sub>10</sub>NO<sub>2</sub> [M+H]<sup>+</sup> 152.0712; found 152.0705. **White solid.**

## Supplementary References

1. Chen, F. et al. Selective catalytic hydrogenation of heteroarenes with N-graphene-modified cobalt nanoparticles (Co<sub>3</sub>O<sub>4</sub>-Co/NGr@ $\alpha$ -Al<sub>2</sub>O<sub>3</sub>). *J. Am. Chem. Soc.* **137**, 11718-11724 (2015).
2. Huang, R. et al. Integration of metal single atoms on hierarchical porous nitrogen-doped carbon for highly efficient hydrogenation of large-sized molecules in the pharmaceutical industry. *ACS Appl. Mater. Interfaces* **12**, 17651-17658 (2020).
3. Li, J. et al. Different active sites in a bifunctional Co@N-doped graphene shells based catalyst for the oxidative dehydrogenation and hydrogenation reactions. *J. Catal.* **355**, 53-62 (2017).
4. Wei, Z. et al. Cobalt encapsulated in N-doped graphene layers: an efficient and stable catalyst for hydrogenation of quinoline compounds. *ACS Catal.* **6**, 5816-5822 (2016).
5. Sahoo, B. et al. A robust iron catalyst for the selective hydrogenation of substituted (iso)quinolones. *Chem. Sci.* **9**, 8134-8141 (2018).
6. Jiang, H. -Y., Zhang, S. -S. & Sun, B. Highly selective hydrogenation with ionic liquid stabilized nickel nanoparticles. *Catal. Lett.* **148**, 1336-1344 (2018).
7. Jagadeesh, R. V. et al. Nanoscale Fe<sub>2</sub>O<sub>3</sub>-based catalysts for selective hydrogenation of nitroarenes to anilines. *Science* **342**, 1073-1076 (2013).
8. Westerhaus, F. A. et al. Heterogenized cobalt oxide catalysts for nitroarene reduction by pyrolysis of molecularly defined complexes. *Nat. Chem.* **5**, 537-543 (2013).
9. Sun, X. et al. Single cobalt sites in mesoporous N-doped carbon matrix for selective catalytic hydrogenation of nitroarenes. *J. Catal.* **357**, 20-28 (2018).
10. Schwob, T. & Kempe, R. A reusable Co catalyst for the selective hydrogenation of functionalized nitroarenes and the direct synthesis of imines and benzimidazoles from nitroarenes and aldehydes. *Angew. Chem. Int. Ed.* **55**, 15175-15179 (2016).
11. Wei, Z. et al. In situ-generated Co<sup>0</sup>-Co<sub>3</sub>O<sub>4</sub>/N-doped carbon nanotubes hybrids as efficient and chemoselective catalysts for hydrogenation of nitroarenes. *ACS Catal.* **5**, 4783-4789 (2015).
12. Jagadeesh, R. V. et al. Cobalt-based nanocatalysts for green oxidation and hydrogenation processes. *Nat. Protocols* **10**, 916-926 (2015).
13. Chen, J. et al. A highly active non-precious metal catalyst based on Fe-N-C@CNTs for nitroarene reduction. *RSC Adv.* **6**, 96203-96209 (2016).
14. Shi, J., Wang, Y., Du, W. & Hou, Z. Synthesis of graphene encapsulated Fe<sub>3</sub>C in carbon nanotubes from biomass and its catalysis application. *Carbon* **99**, 330-337 (2016).
15. Xu, S., Yu, D., Liao, S., Ye, T. & Sheng, H. Nitrogen-doped carbon supported iron oxide as efficient catalysts for chemoselective hydrogenation of nitroarenes. *RSC Adv.* **6**, 96431-96435 (2016).
16. Sahoo, B. et al. Biomass-derived catalysts for selective hydrogenation of nitroarenes. *ChemSusChem* **10**, 3035-3039 (2017).
17. Wang, Y. et al. Carbon film encapsulated Fe<sub>2</sub>O<sub>3</sub>: an efficient catalyst for hydrogenation of nitroarenes. *Chinese. J. Catal.* **38**, 1909-1917 (2017).
18. Sun, X. et al. Metal-organic framework mediated cobalt/nitrogen-doped carbon hybrids as efficient and chemoselective catalysts for the hydrogenation of nitroarenes. *ChemCatChem* **9**, 1854-1862 (2017).
19. Zhang, F. et al. In situ mosaic strategy generated Co-based N-doped mesoporous carbon for highly selective hydrogenation of nitroaromatics. *J. Catal.* **348**, 212-222 (2017).
20. Yang, S. et al. MOF-derived cobalt phosphide/carbon nanocubes for selective hydrogenation of nitroarenes to anilines. *Chem. -Eur. J.* **24**, 4234-4238 (2018).

21. Ji, P. et al. Single-site cobalt catalysts at new  $Zr_{12}(\mu_3-O)_8(\mu_3-OH)_8(\mu_2-OH)_6$  metal-organic framework nodes for highly active hydrogenation of nitroarenes, nitriles, and isocyanides. *J. Am. Chem. Soc.* **139**, 7004-7011 (2017).
22. Zheng, Y. et al. A green reduction of aromatic nitro compounds to aromatic amines over a novel Ni/SiO<sub>2</sub> catalyst passivated with a gas mixture. *Catal. Lett.* **124**, 268-276 (2008).
23. Hahn, G., Ewert, J. -K., Denner, C., Tilgner, D. & Kempe, R. A reusable mesoporous nickel nanocomposite catalyst for the selective hydrogenation of nitroarenes in the presence of sensitive functional groups. *ChemCatChem* **8**, 2461-2465 (2016).
24. Shu, Y. et al. Ni/Mo<sub>2</sub>C nanowires and their carbon-coated composites as efficient catalysts for nitroarenes hydrogenation. *Appl. Surf. Sci.* **396**, 339-346 (2017).
25. Zhang, P. et al. Magnetically recoverable Ni/C catalysts with hierarchical structure and high-stability for selective hydrogenation of nitroarenes. *Phys. Chem. Chem. Phys.* **17**, 145-150 (2015).
26. Ren, Y. et al. Oxygen surface groups of activated carbon steer the chemoselective hydrogenation of substituted nitroarenes over nickel nanoparticles. *Chem. Comm.* **53**, 1969-1972 (2017).
27. Qu, Y., Yang, H., Wang, S., Chen, T. & Wang, G. Hydrogenation of nitrobenzene to aniline catalyzed by C<sub>60</sub>-stabilized Ni. *Catal. Comm.* **97**, 83-87 (2017).
28. Pisiewicz, S. et al. Synthesis of nickel nanoparticles with N-doped graphene shells for catalytic reduction reactions. *ChemCatChem* **8**, 129-134 (2016).
29. Huang, H. et al. Nitrogen-doped graphene-activated metallic nanoparticle-incorporated ordered mesoporous carbon nanocomposites for the hydrogenation of nitroarenes. *RSC Adv.* **8**, 8898-8909 (2018).
30. Ryabchuk, P. et al. Intermetallic nickel silicide nanocatalyst-A non-noble metal-based general hydrogenation catalyst. *Sci. Adv.* **4**, eaat0761 (2018).
31. Jagadeesh, R. V. et al. MOF-derived cobalt nanoparticles catalyze a general synthesis of amines. *Science* **358**, 326-332 (2017).
32. Murugesan, K., Beller, M. & Jagadeesh, R. V. Reusable nickel nanoparticles-catalyzed reductive amination for selective synthesis of primary amines. *Angew. Chem. Int. Ed.* **58**, 5064-5068 (2019).
33. Hahn, G., Kunas, P., de Jonge, N. & Kempe, R. General synthesis of primary amines via reductive amination employing a reusable nickel catalyst. *Nat. Catal.* **2**, 71-77 (2019).
34. Bäumlner, C., Bauer, C. & Kempe, R. The synthesis of primary amines through reductive amination employing an iron catalyst. *ChemSusChem* **13**, 3110-3114 (2020).
35. Liu, X., Wang, Y., Jin, S., Li, X. & Zhang, Z. High performance of nitrogen-doped carbon-supported cobalt catalyst for the mild and selective synthesis of primary amines. *Arab. J. Chem.* **13**, 4916-4925 (2020).
36. Zhou, K. et al. Selective synthesis of furfurylamine by reductive amination of furfural over Raney cobalt. *ChemCatChem* **11**, 5562-5569 (2019).
37. Yuan, H. et al. Reductive amination of furanic aldehydes in aqueous solution over versatile Ni<sub>y</sub>AlO<sub>x</sub> catalysts. *ACS Omega* **4**, 2510-2516 (2019).
38. Yuan, Z., Liu, B., Zhou, P., Zhang, Z. & Chi, Q. Preparation of nitrogen-doped carbon supported cobalt catalysts and its application in the reductive amination. *J. Catal.* **370**, 347-356 (2019).
